# Supplementary material for: Type I CRISPR-Cas provides robust immunity but incomplete attenuation of phage-induced cellular stress
Source: PubMed Central journal article supplement (PMC8754663; doi:10.1093/nar/gkab1210), 2021-12-20
Supplement: gkab1210_supplemental_file.pdf [file gkab1210_supplemental_file.pdf]

1 **Supplementary data**

2

3 **Type I CRISPR-Cas provides robust immunity but incomplete attenuation of phage-**  
4 **induced cellular stress**

5 **Lucia M. Malone<sup>1</sup>, Hannah G. Hampton<sup>1</sup>, Xochitl C. Morgan<sup>1</sup> and Peter C. Fineran<sup>1\*</sup>**

6 <sup>1</sup>Department of Microbiology and Immunology, University of Otago, PO Box 56, Dunedin  
7 9054, New Zealand.

8 \*Author to whom correspondence should be addressed; e-mail: peter.fineran@otago.ac.nz

9

1 **Supplementary figures**

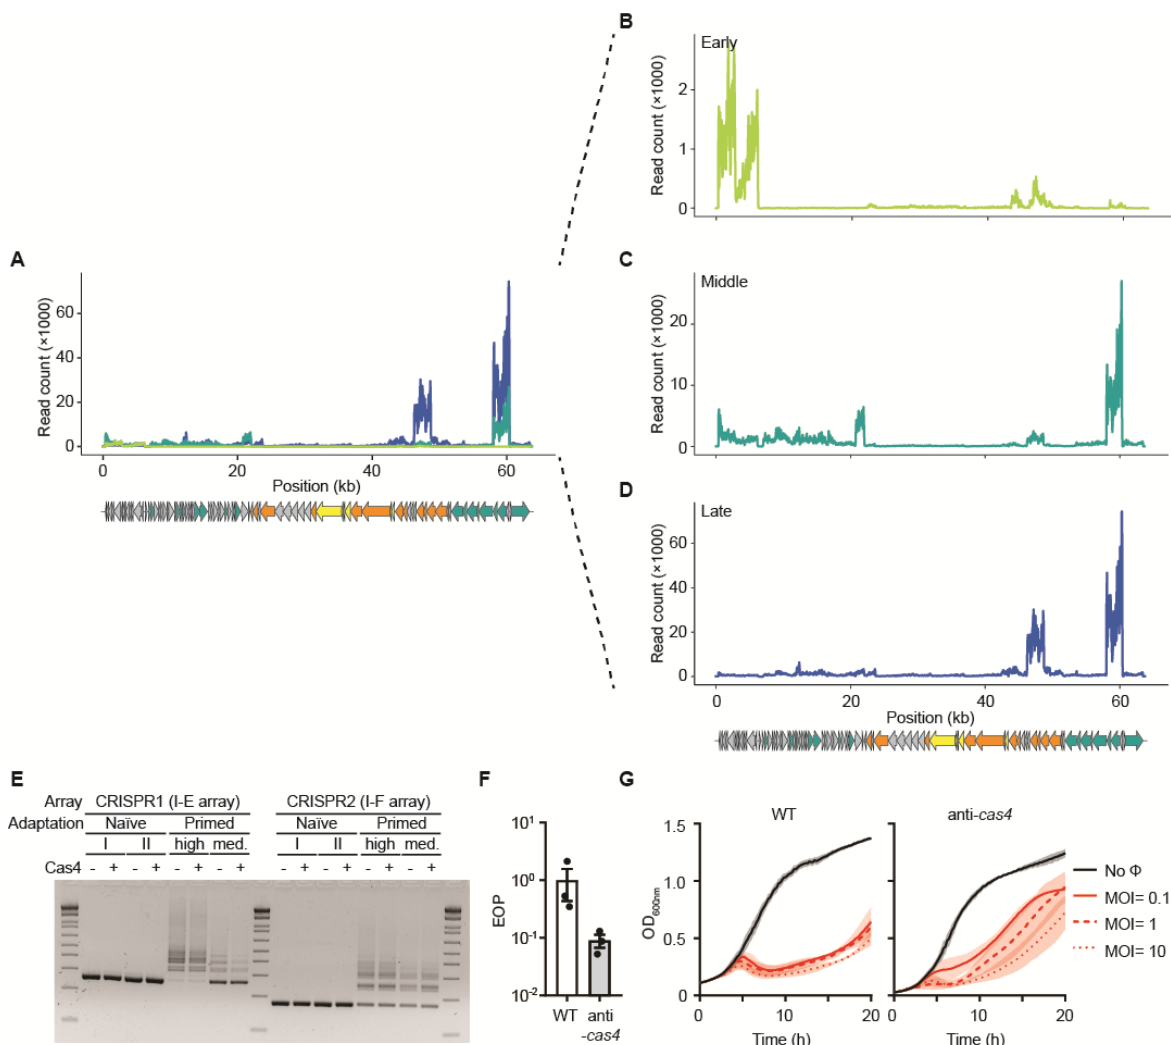

2

3 **Figure S1. Phage genes are highly expressed during late infection.** **A.** RNA read density  
 4 plot across the JS26 genome at **B.** early (5 mpi), **C.** mid (20 mpi) and **D.** late (40 mpi) infection.  
 5 For ease of visualisation, reads from either strand are shown in a single plot (note: no reads  
 6 mapped to non-coding regions). One representative replicate per time point is shown. **E.** Type  
 7 I-E and I-F array expansion during naive (I, pPF953 and II, pPF719) and primed CRISPR  
 8 adaptation (type I-E array expansion: high, pPF1233; medium, pPF1048 and type I-F array  
 9 expansion: high, pPF1242; medium: pPF1243) during *cas4* overexpression (pPF2291, empty  
 10 vector: pPF783) after 3 days of passaging. **F.** Plaquing efficiency and **G.** infection in liquid  
 11 culture of *Serratia* with (anti-*cas4*, pPF2786) or without (WT, pPF1755, empty vector)  
 12 CRISPR-dCas9 silencing vector. In E, F and G experiments were performed in three biological  
 13 triplicates.

14

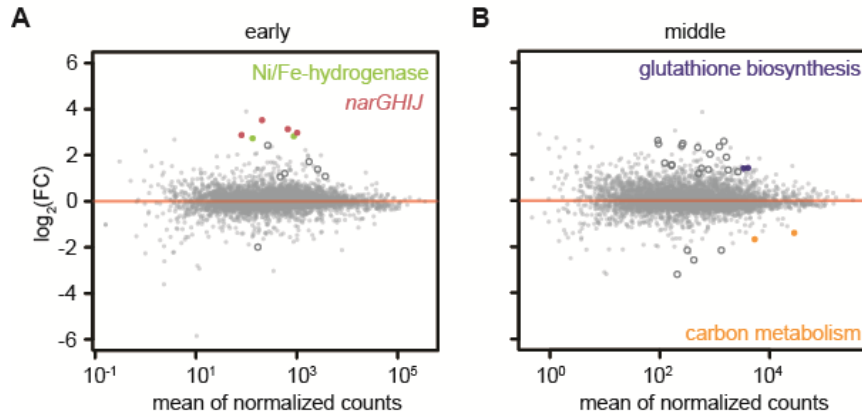

1

2 **Figure S2. The host has a small early and mid response to phage infection.** Expression  
 3 landscape in *Serratia* during **A.** early (5 mpi) and **B.** mid (20 mpi) infection. Genes significantly  
 4 differentially expressed ( $\log_2(\text{FC}) > 1.5$  and  $\text{padj} < 0.05$ ) are represented as coloured dots or  
 5 empty circles.  
 6

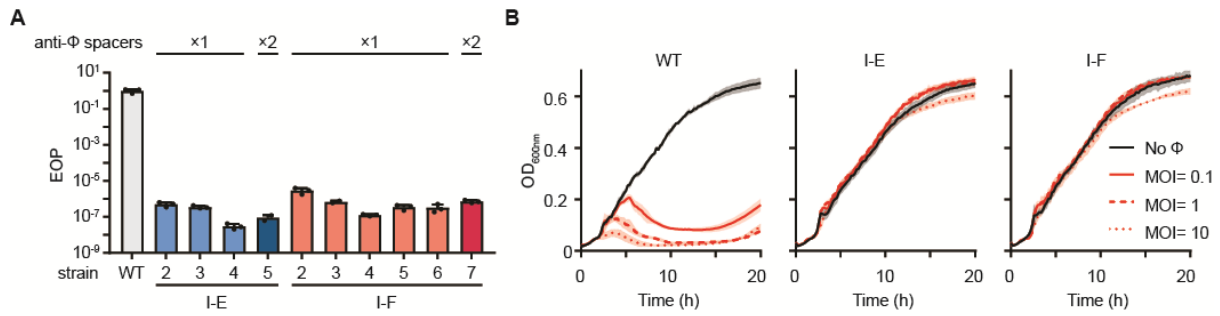

1

2 **Figure S3. Type I CRISPR-Cas systems provide robust immunity against JS26.** A. EOP  
 3 assay on strains carrying anti-JS26 spacers in the CRISPR native arrays CRISPR1 (I-E) and  
 4 CRISPR2 (I-F). Anti-JS26 I-E strains: 2 (PCF552), 3 (PCF554), 4 (PCF556), 5 (PCF558, x2  
 5 anti-JS26 spacers) and anti-JS26 I-F strains: 2 (PCF562), 3 (PCF568), 4 (PCF574), 5  
 6 (PCF577), 6 (PCF579), 7 (PCF580, x2 anti-JS26 spacers). B. Plate reader assay for *Serratia*  
 7 WT and strains with anti-JS26 spacers in the I-E (PCF524) and I-F (PCF525) array uninfected  
 8 (moi=0) or infected with JS26 (moi=0.1, 1 and 10). Data are represented as mean of biological  
 9 triplicates  $\pm$  SD (n=3).

10

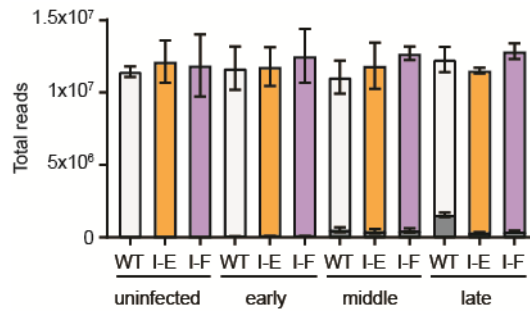

1

2 **Figure S4. CRISPR immunity results in a reduced number of reads mapping to JS26**  
 3 **during late infection.** Total number of reads mapping to *Serratia* WT (pale grey)  
 4 carrying anti-phage spacers in the I-E (orange, PCF524), and I-F (purple, PCF525) CRISPR  
 5 arrays during early (5 mpi), mid (20 mpi) and late (40 mpi) infection. Total number of reads  
 6 mapping to JS26 are represented as dark grey bars.

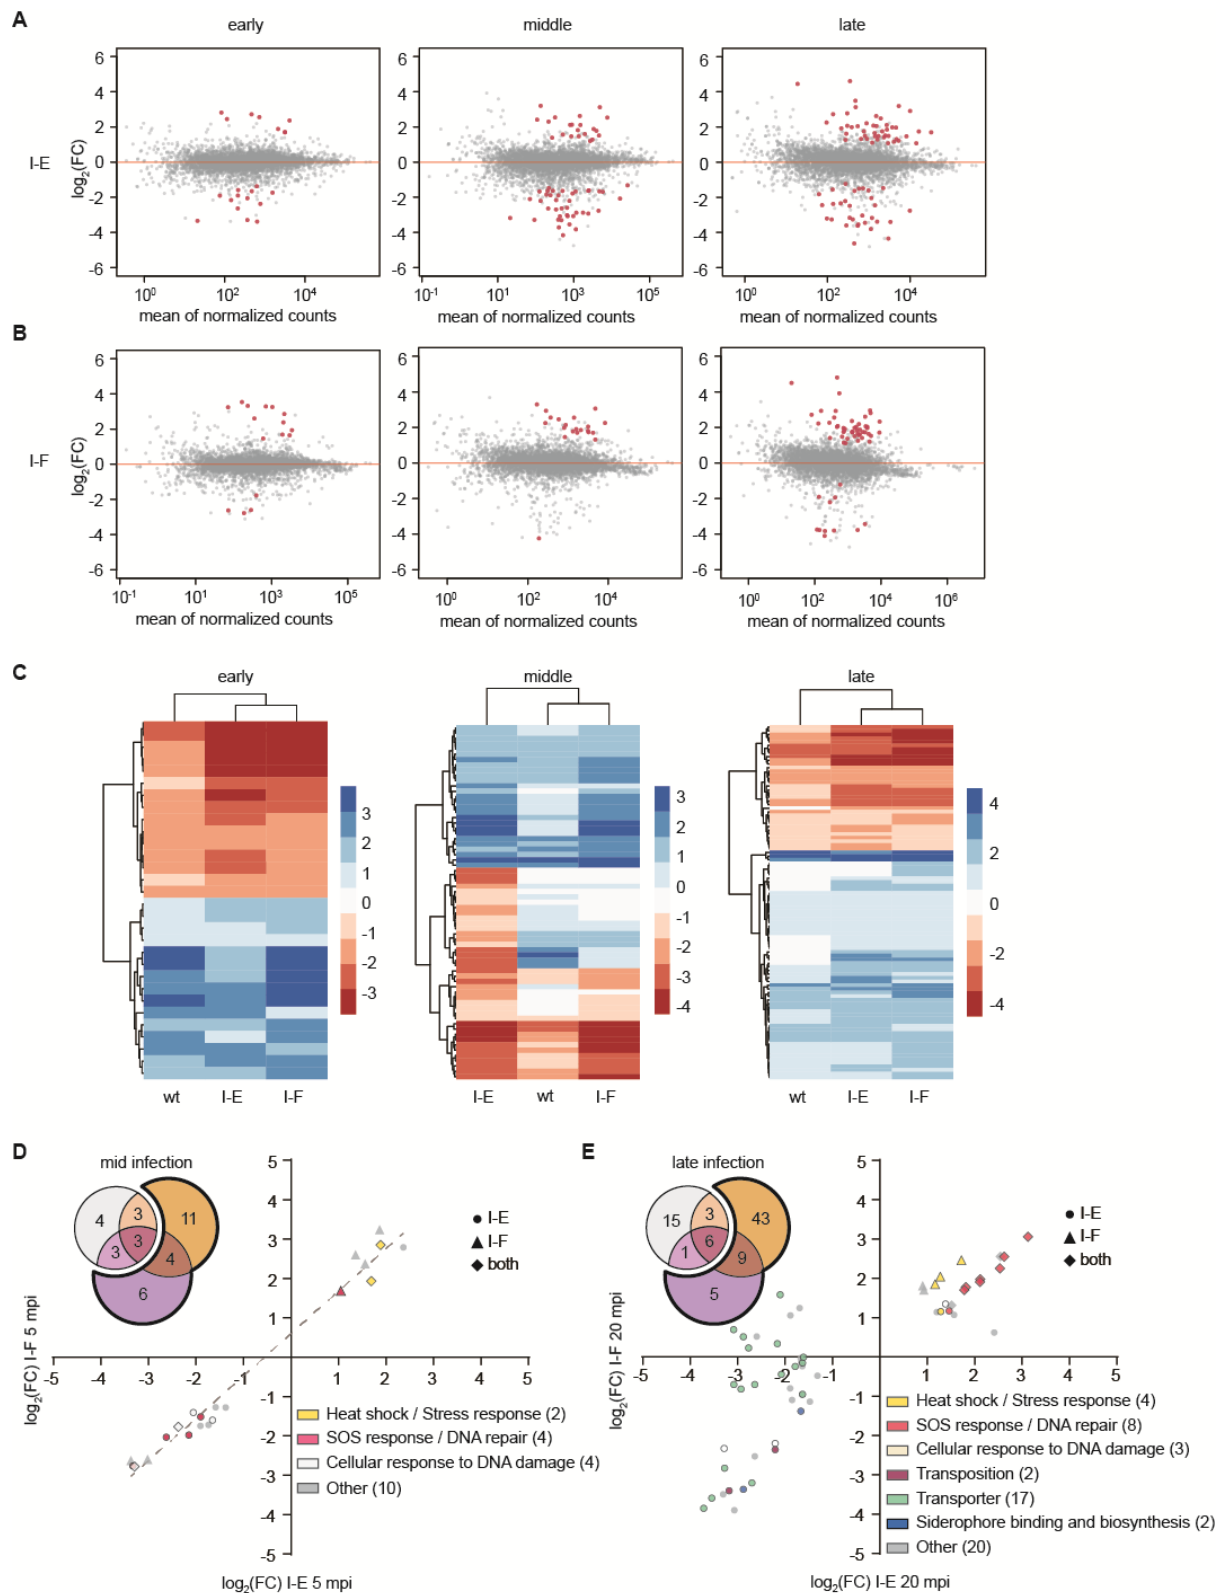

1

2 **Figure S5. Type I-E and I-F targeting results in different transcriptomic landscapes.**  
 3 Expression landscape in **A.** type I-E and **B.** type I-F targeting strains during early, mid and late  
 4 infection. Genes significantly differentially expressed ( $\log_2(\text{FC}) > 1.5$  and  $\text{padj} < 0.05$ ) are  
 5 represented as red dots. **C.** Heat map of significantly differentially expressed genes in *Serratia*  
 6 WT and type I-E and I-F targeting strains throughout infection. Comparison of expression  
 7 landscape in the type I-E and type I-F targeting strains during **D.** early and **E.** mid infection.  
 8 Number of genes significantly differentially expressed only in the I-E (●, orange in Venn

- 1 diagram), the I-F (▲, purple in Venn diagram) or in both strains (◆, brown in Venn diagram)
- 2 were classified into gene ontology.

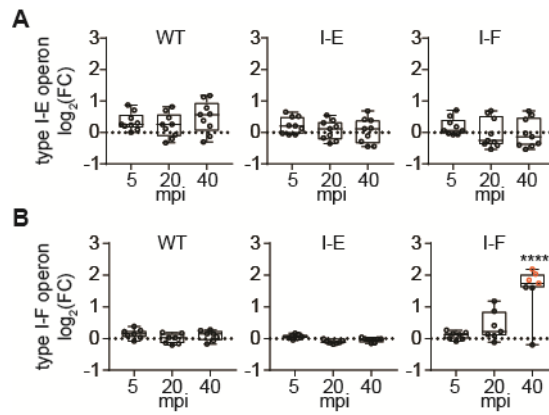

1

2 **Figure S6. The type I-F CRISPR-Cas operon is upregulated upon type I-F targeting.**  
 3 Expression profile of genes encoded in the **A.** type I-E and **B.** type I-F CRISPR-Cas operon  
 4 in *Serratia* WT and type I-E and type I-F targeting strains throughout infection. Genes  
 5 significantly upregulated are represented as red dots. Statistical significance was calculated  
 6 using a two-way ANOVA and a Tukey's test for multiple comparison. \*\*\*\* indicates a  
 7  $\text{padj} < 0.0001$ .  
 8



## Supplementary tables

### Table S1. Primer list

| Name                                              | Sequence                                                  | Description/ Binding site                                                               |
|---------------------------------------------------|-----------------------------------------------------------|-----------------------------------------------------------------------------------------|
| <b>General cloning</b>                            |                                                           |                                                                                         |
| PF2296                                            | TTTTACTAGTGATCGCCATCGCAATCTGAC                            | JS26 Tape measure gene with SpeI site fwd                                               |
| PF2297                                            | TTTTGGTACCAGTCCGGGCGTACCAATCAG                            | JS26 Tape measure gene with KpnI site rev                                               |
| PF1403                                            | AGCTCCTGAAAATCTCGATAAC                                    | Screening primer pPF1257/58 fwd                                                         |
| PF1732                                            | ATAAGATCTTGTTATCCGCTCACAAAGC                              | Screening primer pPF1257/58 rev                                                         |
| PF4692                                            | GTTTTTTTGGGCTAGCGAATTCAAAGAGGAGAAATTAATGATGTCCCGCGGGGTGAC | <i>cas4</i> ( <i>gp81</i> ) + RBS, overlap with pPF783 (EcoRI) for pPF2291 fwd          |
| PF4693                                            | GTCATCCACTGCAGCATGCTTAATCTTTCGCCTTCTTCTTC                 | <i>cas4</i> ( <i>gp81</i> ), overlap with pPF783 (SphI) for construction of pPF2291 rev |
| PF2346                                            | CTGCAAAAATGCAGTAATATCAAGAAGTTTTACATTGATTGGCTCCAATTCTTGAG  | Protospacer targeted by spacer 1 in CRISPR2 for pPF1242/43 fwd                          |
| PF2348                                            | TTTTCCATGGTCTATTCCTGCAAAAATGCAGTAATATCAAG                 | Protospacer targeted by spacer 1 in CRISPR2 for pPF1242 (GAA_PAM) rev                   |
| PF2349                                            | TTTTCCATGGTCTATGCCTGCAAAAATGCAGTAATATCAAG                 | Protospacer targeted by spacer1 in CRISPR2 for pPF1243 (GCA_PAM) rev                    |
| <b>CRISPR expansion PCRs</b>                      |                                                           |                                                                                         |
| PF1989                                            | TAAGTTAGTGTTCTTTAACAAGCAGGA                               | CRISPR1 expansion screening fwd                                                         |
| PF1887                                            | GTTAAGTCAGCAGGCGTTTAGTCG                                  | CRISPR1 expansion screening rev                                                         |
| PF633                                             | GTGGATCTGGATGGACTGC                                       | CRISPR1 expansion screening fwd                                                         |
| PF2177                                            | TACTGAATTCAGGCGTTTCGTCGTTTTGTG                            | CRISPR1 expansion screening rev                                                         |
| PF1990                                            | CACGAAAATGATAATTGATGCTGAT                                 | CRISPR2 expansion screening fwd                                                         |
| PF1888                                            | CATCTGATGCTGACGACTG                                       | CRISPR2 expansion screening rev                                                         |
| <b>Transposon mutagenesis / Arbitrary PCR</b>     |                                                           |                                                                                         |
| PF106                                             | GACCACACGTCGACTAGTGCNNNNNNNNNAGAG                         | Random primed PCR primer 1                                                              |
| PF107                                             | GACCACACGTCGACTAGTGCNNNNNNNNNACGCC                        | Random primed PCR primer 2                                                              |
| PF108                                             | GACCACACGTCGACTAGTGCNNNNNNNNNGATAC                        | Random primed PCR primer 3                                                              |
| PF109                                             | GACCACACGTCGACTAGTGC                                      | Random primed PCR adapter primer                                                        |
| PF226                                             | CATAAGGGACTCCTCATTAAG                                     | Nested primer                                                                           |
| PF1212                                            | CGGGAATTCTCATGTTTGAC                                      | Nested primer                                                                           |
| <b>RNA extraction DNA contamination screening</b> |                                                           |                                                                                         |
| PF796                                             | ATAGAATTCAGGAGGAATAATGGGTACTTCTGAGTTACTTAAGC              | <i>flhDC</i> forward                                                                    |
| PF797                                             | GATCCCGGTCAGACTGCGTGTTTTACTTG                             | <i>flhDC</i> reverse                                                                    |

**Table S2. Plasmid list**

| Name                                | Features                                             | Description                                                                                             | Construction                                   | Reference                       |
|-------------------------------------|------------------------------------------------------|---------------------------------------------------------------------------------------------------------|------------------------------------------------|---------------------------------|
| <b>Priming vectors</b>              |                                                      |                                                                                                         |                                                |                                 |
| pPF1125                             | RP4/oriT,<br>pBR322_origin, CmR,<br>mCherry, lacI/T5 | Phage priming vector with I-E PPS (spacer 1 CGT PAM)                                                    |                                                | (1)                             |
| pPF1126                             | RP4/oriT,<br>pBR322_origin, CmR,<br>mCherry, lacI/T5 | Phage priming vector with I-F PPS (spacer 2 GT PAM)                                                     |                                                | (1)                             |
| pPF1257                             | RP4/oriT,<br>pBR322_origin, CmR,<br>mCherry, lacI/T5 | Phage priming vector with I-E PPS (spacer 1 CGT PAM) with tail tape measure gene insert ( <i>gp61</i> ) | PF2296/PF2297 into pPF1125 (SpeI, KpnI)        | This study                      |
| pPF1258                             | RP4/oriT,<br>pBR322_origin, CmR,<br>mCherry, lacI/T5 | Phage priming vector with I-F PPS (spacer 2 GT PAM) with tail tape measure gene insert ( <i>gp61</i> )  | PF2296/PF2297 into pPF1126 (SpeI, KpnI)        | This study                      |
| <b>cas4 heterologous expression</b> |                                                      |                                                                                                         |                                                |                                 |
| pPF783                              | OriT, p15A, GmR,<br>AraC                             | Expression vector                                                                                       |                                                | Jackson, unpublished            |
| pPF2291                             | OriT, p15A, GmR,<br>AraC                             | <i>cas4</i> ( <i>gp81</i> ) expression vector                                                           | PF4692/PF4693 (JS26) into pPF783 (EcoRI, SphI) | This study                      |
| <b>Adaptation assay</b>             |                                                      |                                                                                                         |                                                |                                 |
| pPF719                              | RP4/oriT,<br>pBR322_origin, TcR,<br>mCherry, lacI/T5 | Naïve control priming plasmid (no protospacer)                                                          |                                                | (2)                             |
| pPF953                              | RP4/oriT,<br>pBR322_origin, TcR,<br>mCherry, lacI/T5 | Naïve control priming plasmid (no protospacer)                                                          |                                                | (1)                             |
| pPF1233                             | RP4/oriT,<br>pBR322_origin, TcR,<br>mCherry, lacI/T5 | Type I-E priming plasmid containing protospacer from CRISPR1 spacer 1 (CGT_PAM)                         |                                                | (3)                             |
| pPF1048                             | RP4/oriT,<br>pBR322_origin, TcR,<br>mCherry, lacI/T5 | Type I-E priming plasmid containing protospacer from CRISPR1 spacer 1 (TCA_PAM)                         |                                                | (2)                             |
| pPF1242                             | RP4/oriT,<br>pBR322_origin, TcR,<br>mCherry, lacI/T5 | Type I-F priming plasmid containing protospacer from CRISPR2 spacer 1 (GAA_PAM)                         | PF2346/PF2348 into pPF953 (NcoI/XhoI)          | Jackson, unpublished            |
| pPF1243                             | RP4/oriT,<br>pBR322_origin, TcR,<br>mCherry, lacI/T5 | Type I-F priming plasmid containing protospacer from CRISPR2 spacer 1 (GCA_PAM)                         | PF2346/PF2348 into pPF953 (NcoI/XhoI)          | Jackson, unpublished            |
| <b>CRISPRi</b>                      |                                                      |                                                                                                         |                                                |                                 |
| pPF1755                             | oriT, RK2, KmR, AraC,<br>dCas9                       | dCas9 HF expression vector                                                                              |                                                | Jackson and Yin, unpublished    |
| pPF2786                             | oriT, RK2, KmR, AraC,<br>dCas9                       | dCas9 HF expression vector with gRNA targeting <i>cas4</i> ( <i>gp81</i> in JS26)                       | pPF1755 (BsaI) + PF5506/PF5507                 | Malone and Harding, unpublished |

**Table S3. Strain list**

| Species                                             | Strain       | Description                                                                 | Notes        | Construction              | Reference  |
|-----------------------------------------------------|--------------|-----------------------------------------------------------------------------|--------------|---------------------------|------------|
| <i>E. coli</i>                                      | DH5 $\alpha$ | Cloning strain                                                              |              |                           | Gibco/BRL  |
| <i>E. coli</i>                                      | ST18         | Auxotrophic donor for biparental conjugation                                | Requires ALA |                           | (4)        |
| <i>Serratia</i> sp. ATCC 39006                      | LacA         | <i>lac</i> EMS mutant, denoted WT                                           |              |                           | (5)        |
| <b>Receptor mutants</b>                             |              |                                                                             |              |                           |            |
| <i>Serratia</i> sp. ATCC 39006                      | PCF619       | <i>flgI</i> ::mini-Tn5, flagella mutant                                     | KmR          | transposon mutagenesis    | This study |
| <i>Serratia</i> sp. ATCC 39006                      | PCF620       | <i>flhD</i> ::mini-Tn5, flagella mutant                                     | KmR          | transposon mutagenesis    | This study |
| <i>Serratia</i> sp. ATCC 39006                      | PCF621       | <i>fliR</i> ::mini-Tn5, flagella mutant                                     | KmR          | transposon mutagenesis    | This study |
| <i>Serratia</i> sp. ATCC 39006                      | PCF623       | <i>flhC</i> ::mini-Tn5, flagella mutant                                     | KmR          | transposon mutagenesis    | This study |
| <i>Serratia</i> sp. ATCC 39006                      | PCF879       | $\Delta$ <i>flhDC</i> , flagella master transcriptional regulator knock-out | CmR          |                           | (6)        |
| <b>Strains with spacers in native CRISPR arrays</b> |              |                                                                             |              |                           |            |
| <i>Serratia</i> sp. ATCC 39006                      | PCF524       | anti-JS26 spacer in type I-E system                                         |              | plasmid loss with pPF1257 | This study |
| <i>Serratia</i> sp. ATCC 39006                      | PCF552       | anti-JS26 spacer in type I-E system                                         |              | plasmid loss with pPF1257 | This study |
| <i>Serratia</i> sp. ATCC 39006                      | PCF554       | anti-JS26 spacer in type I-E system                                         |              | plasmid loss with pPF1257 | This study |
| <i>Serratia</i> sp. ATCC 39006                      | PCF556       | anti-JS26 spacer in type I-E system                                         |              | plasmid loss with pPF1257 | This study |
| <i>Serratia</i> sp. ATCC 39006                      | PCF558       | anti-JS26 spacer in type I-E system                                         |              | plasmid loss with pPF1257 | This study |
| <i>Serratia</i> sp. ATCC 39006                      | PCF525       | anti-JS26 spacer in type I-F system                                         |              | plasmid loss with pPF1258 | This study |
| <i>Serratia</i> sp. ATCC 39006                      | PCF562       | anti-JS26 spacer in type I-F system                                         |              | plasmid loss with pPF1258 | This study |
| <i>Serratia</i> sp. ATCC 39006                      | PCF568       | anti-JS26 spacer in type I-F system                                         |              | plasmid loss with pPF1258 | This study |
| <i>Serratia</i> sp. ATCC 39006                      | PCF574       | anti-JS26 spacer in type I-F system                                         |              | plasmid loss with pPF1258 | This study |
| <i>Serratia</i> sp. ATCC 39006                      | PCF577       | anti-JS26 spacer in type I-F system                                         |              | plasmid loss with pPF1258 | This study |
| <i>Serratia</i> sp. ATCC 39006                      | PCF579       | anti-JS26 spacer in type I-F system                                         |              | plasmid loss with pPF1258 | This study |
| <i>Serratia</i> sp. ATCC 39006                      | PCF580       | anti-JS26 spacer in type I-F system                                         |              | plasmid loss with pPF1258 | This study |

**Table S4. Spacers in native CRISPR arrays**

| Strain name | a.k.a. | No. of new spacers | Sequence                                                                                                                                                                             | Protospacer                                                                                         |
|-------------|--------|--------------------|--------------------------------------------------------------------------------------------------------------------------------------------------------------------------------------|-----------------------------------------------------------------------------------------------------|
| PCF524      | I-E_1  | 1                  | AAACTCGGCGGTACCGAGGGCGCGGCCTTCCA                                                                                                                                                     | Phage tape measure gene                                                                             |
| PCF554      | I-E_3  | 4                  | TAGGCCACCCGCGAGCGGGTGTTCTTCTTC<br>GCCACGCCACCGAGTCAGCGGCACCCTTGAT<br>CGTGGCGCTTTCTCATAGCTCACGCTGTAGGT<br>GGTGAACACTATCCCATATCACCAGCTCACCG                                            | oriT<br>Phage tape measure gene<br>pBR322_origin<br>Cm resistance                                   |
| PCF556      | I-E_4  | 3                  | GCCGCTTTGTTGGCCTCCGCAAACCTGGCGAAT<br>CGTGGCGCTTTCTCATAGCTCACGCTGTAGGT<br>GGTGAACACTATCCCATATCACCAGCTCACCG                                                                            | Phage tape measure gene<br>pBR322_origin<br>Cm resistance                                           |
| PCF558      | I-E_5  | 5                  | GCGCGTGCTGCCGAGGACGGCGGGAAGGCTG<br>A<br>AGTGGAAGCGGCGATGGCGGAGCTGAATTACA<br>ATTGCAGCGATCGAGCAGCAACTGCAGGCGGC<br>CGTGGCGCTTTCTCATAGCTCACGCTGTAGGT<br>GGTGAACACTATCCCATATCACCAGCTCACCG | Phage tape measure gene<br><i>lacI</i><br>Phage tape measure gene<br>pBR322_origin<br>Cm resistance |
| PCF525      | I-F_1  | 1                  | TGATACTCGTCGAGGTTAGCCATCAGGGTGTT                                                                                                                                                     | Phage tape measure gene                                                                             |
| PCF562      | I-F_2  | 1                  | ACGATCGAGTCGAAGGCCACGCCACCGAGTC                                                                                                                                                      | Phage tape measure gene                                                                             |
| PCF568      | I-F_3  | 2                  | TTGATGCCCATCTGCAGGTAGTCGTTGAGTTC<br>ACTTCAAGAACTCTGTAGCACCGCCTACATAC                                                                                                                 | Phage tape measure gene<br>pBR322_origin                                                            |
| PCF574      | I-F_4  | 2                  | GAACATATMGGACCATTMGGCAGTCCCGTTCT<br>AGTTWTGATTTAAACGTGGCCAATATGGACAA                                                                                                                 | Phage tape measure gene<br>Cm resistance                                                            |
| PCF577      | I-F_5  | 1                  | GGTAATGGCACCCATGTCGCCCTGCAGCGCTT                                                                                                                                                     | Phage tape measure gene                                                                             |
| PCF579      | I-F_6  | 2                  | CAGGACTCCTCCCTGCAGGACGGCGAGTTCAT<br>ATTTTATCGCCCCGGGTTGTCAGCCGGTCACG                                                                                                                 | mCherry<br>Phage tape measure gene                                                                  |
| PCF580      | I-F_7  | 3                  | AATGTGCTGTTAAGCAGCAGCGCCTGGTCCCTC<br>TGGGCCAACTTTTGGCGAAAATGAGACGTTGA<br>CTTGATGCCCATCTGCAGGTAGTCGTTGAGTT                                                                            | Phage tape measure gene<br>plasmid backbone<br>Phage tape measure gene                              |

**Table S5. JS26 genome annotation**

| ORF         | Protein function                                  | Start (bp) | Stop (bp) | Length (bp) | Proteomic hit <sup>(1)</sup> | Strand |
|-------------|---------------------------------------------------|------------|-----------|-------------|------------------------------|--------|
| <i>gp01</i> | Hypothetical protein CDS                          | 752        | 895       | 144         |                              | -      |
| <i>gp02</i> | Hypothetical protein CDS                          | 892        | 1218      | 327         |                              | -      |
| <i>gp03</i> | Hypothetical protein CDS                          | 1205       | 1690      | 486         |                              | -      |
| <i>gp04</i> | Hypothetical protein CDS                          | 1693       | 1989      | 297         |                              | -      |
| <i>gp05</i> | Hypothetical protein CDS                          | 1989       | 2972      | 984         |                              | -      |
| <i>gp06</i> | Hypothetical protein CDS                          | 3080       | 3292      | 213         |                              | -      |
| <i>gp07</i> | Hypothetical protein CDS                          | 3279       | 3593      | 315         |                              | -      |
| <i>gp08</i> | Hypothetical protein CDS                          | 3586       | 3756      | 171         |                              | -      |
| <i>gp09</i> | DnaA C-terminal domain containing protein CDS     | 3758       | 4243      | 486         |                              | -      |
| <i>gp10</i> | Hypothetical protein CDS                          | 4268       | 4543      | 276         |                              | -      |
| <i>gp11</i> | Hypothetical protein CDS                          | 4540       | 4860      | 321         |                              | -      |
| <i>gp12</i> | Hypothetical protein CDS                          | 4895       | 6073      | 1179        |                              | -      |
| <i>gp13</i> | Hypothetical protein CDS                          | 6099       | 6314      | 216         |                              | -      |
| <i>gp14</i> | Hypothetical protein CDS                          | 6676       | 6918      | 243         |                              | +      |
| <i>gp15</i> | Hypothetical protein CDS                          | 7132       | 7422      | 291         |                              | +      |
| <i>gp16</i> | NAD-dependent DNA ligase CDS                      | 7497       | 8003      | 507         |                              | +      |
| <i>gp17</i> | Hypothetical protein CDS                          | 7993       | 8622      | 630         |                              | +      |
| <i>gp18</i> | Hypothetical protein CDS                          | 8612       | 8881      | 270         |                              | +      |
| <i>gp19</i> | Phage protein CDS                                 | 8932       | 9294      | 363         |                              | +      |
| <i>gp20</i> | Hypothetical protein CDS                          | 9297       | 9860      | 564         |                              | +      |
| <i>gp21</i> | Hypothetical protein CDS                          | 9853       | 10119     | 267         |                              | +      |
| <i>gp22</i> | Phage protein CDS                                 | 10112      | 10900     | 789         |                              | +      |
| <i>gp23</i> | Hypothetical protein CDS                          | 10985      | 11248     | 264         |                              | +      |
| <i>gp24</i> | Putative ssDNA binding protein CDS                | 11248      | 11775     | 528         |                              | +      |
| <i>gp25</i> | Hypothetical protein CDS                          | 11753      | 12046     | 294         |                              | +      |
| <i>gp26</i> | Hypothetical protein CDS                          | 12043      | 12231     | 189         |                              | +      |
| <i>gp27</i> | Nucleoside Triphosphate Pyrophosphohydrolase CDS  | 12218      | 12589     | 372         |                              | +      |
| <i>gp28</i> | Hypothetical protein CDS                          | 12636      | 13031     | 396         |                              | +      |
| <i>gp29</i> | Hypothetical protein CDS                          | 13031      | 13384     | 354         |                              | +      |
| <i>gp30</i> | Hypothetical protein CDS                          | 13381      | 13614     | 234         |                              | +      |
| <i>gp31</i> | Hypothetical protein CDS                          | 13611      | 14000     | 390         |                              | +      |
| <i>gp32</i> | Putative methylase CDS                            | 13990      | 14718     | 729         |                              | +      |
| <i>gp33</i> | DNA recombination-dependent growth factor C CDS   | 14720      | 15844     | 1125        |                              | +      |
| <i>gp34</i> | Hypothetical protein CDS                          | 16013      | 16396     | 384         |                              | +      |
| <i>gp35</i> | Hypothetical protein CDS                          | 16393      | 16671     | 279         |                              | +      |
| <i>gp36</i> | Hypothetical protein CDS                          | 16768      | 17406     | 639         |                              | +      |
| <i>gp37</i> | Hypothetical protein CDS                          | 17406      | 17717     | 312         |                              | +      |
| <i>gp38</i> | Hypothetical protein CDS                          | 17710      | 18429     | 720         |                              | +      |
| <i>gp39</i> | Putative Nucleoside 2-deoxyribosyltransferase CDS | 18429      | 18836     | 408         |                              | +      |
| <i>gp40</i> | Hypothetical protein CDS                          | 18907      | 19320     | 414         |                              | +      |
| <i>gp41</i> | Hypothetical protein CDS                          | 19492      | 19800     | 309         |                              | +      |

| ORF         | Protein function                              | Start (bp) | Stop (bp) | Length (bp) | Proteomic hit | Strand |
|-------------|-----------------------------------------------|------------|-----------|-------------|---------------|--------|
| <i>gp42</i> | Hypothetical protein CDS                      | 19800      | 20045     | 246         |               | +      |
| <i>gp43</i> | N-6-adenine-methyltransferase CDS             | 20042      | 20749     | 708         |               | +      |
| <i>gp44</i> | Phage protein CDS                             | 20884      | 21921     | 1038        |               | +      |
| <i>gp45</i> | Hypothetical protein CDS                      | 21936      | 22124     | 189         |               | +      |
| <i>gp46</i> | Phage protein CDS                             | 22284      | 22553     | 270         |               | -      |
| <i>gp47</i> | Phage capsid and scaffold CDS                 | 22550      | 23314     | 765         | x             | -      |
| <i>gp48</i> | Hypothetical protein CDS                      | 23326      | 23655     | 330         |               | -      |
| <i>gp49</i> | Putative capsid protein CDS                   | 23663      | 25786     | 2124        | x             | -      |
| <i>gp50</i> | Hypothetical protein CDS                      | 25796      | 27043     | 1248        | x             | -      |
| <i>gp51</i> | Hypothetical protein CDS                      | 27054      | 28199     | 1146        | x             | -      |
| <i>gp52</i> | Phage protein CDS                             | 28212      | 29228     | 1017        | x             | -      |
| <i>gp53</i> | Phage protein CDS                             | 29241      | 30191     | 951         | x             | -      |
| <i>gp54</i> | Phage protein CDS                             | 30194      | 31156     | 963         | x             | -      |
| <i>gp55</i> | Tail fiber protein CDS                        | 31156      | 31890     | 735         | x             | -      |
| <i>gp56</i> | Putative tail assembly protein CDS            | 31902      | 35720     | 3819        | x             | -      |
| <i>gp57</i> | Putative tail assembly protein CDS            | 35707      | 35928     | 222         |               | -      |
| <i>gp58</i> | Putative tail assembly protein CDS            | 35928      | 36170     | 243         |               | -      |
| <i>gp59</i> | Putative tail assembly protein CDS            | 36181      | 37002     | 822         | x             | -      |
| <i>gp60</i> | Putative distal tail protein                  | 37013      | 38698     | 1686        | x             | -      |
| <i>gp61</i> | Putative tail length tape measure protein CDS | 38709      | 42851     | 4143        | x             | -      |
| <i>gp62</i> | Putative tail assembly protein CDS            | 42844      | 43089     | 246         |               | -      |
| <i>gp63</i> | Putative tail assembly protein CDS            | 43086      | 43547     | 462         |               | -      |
| <i>gp64</i> | Putative tail protein CDS                     | 43677      | 44816     | 1140        | x             | -      |
| <i>gp65</i> | Putative minor tail protein CDS               | 44829      | 45371     | 543         | x             | -      |
| <i>gp66</i> | Phage protein CDS                             | 45368      | 45985     | 618         | x             | -      |
| <i>gp67</i> | Phage protein CDS                             | 45987      | 46361     | 375         | x             | -      |
| <i>gp68</i> | hypothetical protein CDS                      | 46364      | 46735     | 372         |               | -      |
| <i>gp69</i> | Phage major capsid protein CDS                | 46799      | 47863     | 1065        | x             | -      |
| <i>gp70</i> | Capsid decoration protein CDS                 | 47874      | 48275     | 402         | x             | -      |
| <i>gp71</i> | Head-tail preconnector protein GP5 CDS        | 48286      | 49575     | 1290        | x             | -      |
| <i>gp72</i> | Phage portal protein CDS                      | 49581      | 51284     | 1704        | x             | -      |
| <i>gp73</i> | Head-tail joining protein CDS                 | 51284      | 51538     | 255         | x             | -      |
| <i>gp74</i> | Hypothetical protein CDS                      | 51549      | 51857     | 309         |               | -      |
| <i>gp75</i> | Terminase large subunit CDS                   | 51972      | 53630     | 1659        |               | -      |
| <i>gp76</i> | Terminase small subunit CDS                   | 53614      | 54240     | 627         |               | -      |
| <i>gp77</i> | DNA helicase, phage-associated CDS            | 54240      | 55727     | 1488        |               | -      |
| <i>gp78</i> | VRR-NUC domain protein CDS                    | 55714      | 56001     | 288         |               | -      |
| <i>gp79</i> | DNA polymerase B region CDS                   | 55998      | 58064     | 2067        |               | -      |
| <i>gp80</i> | Putative ligase CDS                           | 58157      | 58741     | 585         |               | -      |
| <i>gp81</i> | Putative Cas4 CDS                             | 58762      | 60057     | 1296        |               | -      |
| <i>gp82</i> | Hypothetical protein CDS                      | 60057      | 60458     | 402         |               | -      |
| <i>gp83</i> | Hypothetical protein CDS                      | 60682      | 60942     | 261         |               | +      |
| <i>gp84</i> | DNA primase/helicase, phage-associated CDS    | 60952      | 63522     | 2571        |               | +      |

<sup>(1)</sup> Details provided in Table S6.

**Table S6. Proteomic hits**

| ORF         | Description                        | # Unique Peptides <sup>1</sup> | # PSMs <sup>2</sup> | Coverage (%) <sup>3</sup> | Sum PEP Score <sup>4</sup> | Score Mascot <sup>5</sup> |
|-------------|------------------------------------|--------------------------------|---------------------|---------------------------|----------------------------|---------------------------|
| <i>gp47</i> | Phage capsid and scaffold CDS      | 3                              | 10                  | 15.0                      | 17.0                       | 150.3                     |
| <i>gp49</i> | Putative capsid protein CDS        | 68                             | 1241                | 87.9                      | 951.0                      | 21469.9                   |
| <i>gp50</i> | Hypothetical protein CDS           | 34                             | 1182                | 74.0                      | 556.2                      | 21306.4                   |
| <i>gp51</i> | Hypothetical protein CDS           | 23                             | 1214                | 65.9                      | 431.4                      | 20354.0                   |
| <i>gp52</i> | Phage protein CDS                  | 63                             | 2108                | 86.1                      | 694.9                      | 41213.1                   |
| <i>gp53</i> | Phage protein CDS                  | 35                             | 1677                | 76.9                      | 538.7                      | 36132.3                   |
| <i>gp54</i> | Phage protein CDS                  | 49                             | 1654                | 93.4                      | 625.6                      | 30050.2                   |
| <i>gp55</i> | Tail fibre protein CDS             | 16                             | 483                 | 81.1                      | 329.0                      | 7820.9                    |
| <i>gp56</i> | Putative tail assembly protein CDS | 152                            | 2748                | 82.4                      | 1967.1                     | 43757.5                   |
| <i>gp59</i> | Putative tail assembly protein CDS | 28                             | 743                 | 75.5                      | 316.2                      | 11922.2                   |
| <i>gp60</i> | Putative distal tail protein       | 49                             | 1508                | 64.2                      | 630.7                      | 25676.0                   |
| <i>gp61</i> | Putative tape measure protein CDS  | 223                            | 5751                | 84.2                      | 3275.0                     | 109573.6                  |
| <i>gp64</i> | Putative tail protein CDS          | 169                            | 14174               | 84.4                      | 2195.9                     | 254994.2                  |
| <i>gp65</i> | Putative minor tail protein CDS    | 18                             | 682                 | 92.9                      | 361.0                      | 10805.6                   |
| <i>gp66</i> | Phage protein CDS                  | 13                             | 291                 | 68.8                      | 248.7                      | 5448.1                    |
| <i>gp67</i> | Phage protein CDS                  | 12                             | 234                 | 83.9                      | 152.3                      | 4642.6                    |
| <i>gp69</i> | Phage major capsid protein CDS     | 276                            | 27045               | 97.2                      | 4065.4                     | 419874.7                  |
| <i>gp70</i> | Capsid decoration protein CDS      | 101                            | 3541                | 100.0                     | 1375.0                     | 59501.7                   |
| <i>gp71</i> | Head-tail preconnector protein CDS | 27                             | 373                 | 54.3                      | 297.5                      | 6800.3                    |
| <i>gp72</i> | Phage portal protein CDS           | 124                            | 4507                | 84.0                      | 1751.1                     | 79681.0                   |
| <i>gp73</i> | Head-tail joining protein CDS      | 10                             | 260                 | 98.8                      | 110.3                      | 5326.1                    |

<sup>1</sup>Unique peptides identified per protein. <sup>2</sup>The number of acquired peptide spectra per protein (PSMs - peptide spectral matches), resulting in the identified <sup>3</sup>sequence coverage (coverage (%)). <sup>4</sup>Protein score calculated as the negative logarithms of the Posterior Error Probability values of PSMs. <sup>5</sup>Score calculated by search engine Mascot.

**Table S7. Genes differentially expressed in *Serratia* during phage infection**

| ORF (CWC46_)           | Function                                                                                                         | GO molecular function                                       | log2(FC) | lfcSE | padj     |
|------------------------|------------------------------------------------------------------------------------------------------------------|-------------------------------------------------------------|----------|-------|----------|
| <b>Early infection</b> |                                                                                                                  |                                                             |          |       |          |
| RS02465                | ribose ABC transporter permease                                                                                  | transport activity                                          | 1.39     | 0.20  | 1.67E-02 |
| RS05850                | NhaA, Na <sup>+</sup> /H <sup>+</sup> antiporter                                                                 | sodium ion transport / pH regulation                        | 1.21     | 0.13  | 1.86E-03 |
| RS10625                | Ni/Fe-hydrogenase cytochrome b subunit                                                                           | unknown                                                     | 2.73     | 0.51  | 1.47E-02 |
| RS10630                | cytochrome-c3 hydrogenase                                                                                        | redox activity                                              | 2.82     | 0.53  | 1.47E-02 |
| RS12605                | NarG, nitrate reductase subunit alpha                                                                            | nitrate reductase activity / electron carrier               | 2.97     | 0.64  | 4.90E-02 |
| RS12610                | NarH, nitrate reductase subunit beta                                                                             | nitrate reductase activity / electron carrier               | 3.13     | 0.60  | 1.47E-02 |
| RS12615                | NarJ, nitrate reductase molybdenum cofactor assembly chaperone                                                   | nitrate reductase activity / electron carrier               | 3.52     | 0.60  | 1.51E-03 |
| RS12620                | NarI, respiratory nitrate reductase subunit gamma                                                                | nitrate reductase activity / electron carrier               | 2.88     | 0.46  | 1.51E-03 |
| RS16055                | LysR family transcriptional regulator                                                                            | transcription regulation                                    | 1.72     | 0.27  | 1.54E-02 |
| RS16060                | S-(hydroxymethyl)glutathione dehydrogenase/class III alcohol dehydrogenase                                       | redox activity                                              | 1.08     | 0.13  | 4.90E-02 |
| RS18585                | GalS, HTH-type transcriptional regulator                                                                         | transcription regulation                                    | -1.99    | 0.34  | 1.52E-02 |
| RS19145                | PhoB, phosphate regulon transcriptional regulatory protein                                                       | transcription regulation / phosphorelay signal transduction | 1.06     | 0.12  | 3.04E-02 |
| RS21500                | hypothetical protein                                                                                             | unknown                                                     | 2.43     | 0.45  | 1.77E-02 |
| <b>Mid infection</b>   |                                                                                                                  |                                                             |          |       |          |
| RS00220                | LysR family transcriptional regulator                                                                            | transcription regulation                                    | 2.48     | 0.44  | 7.18E-03 |
| RS00965                | FadB, fatty acid oxidation complex subunit alpha                                                                 | fatty acid metabolism                                       | 2.57     | 0.40  | 3.43E-04 |
| RS00970                | FadA, acetyl-CoA C-acyltransferase                                                                               | fatty acid metabolism                                       | 2.30     | 0.39  | 4.03E-03 |
| RS03770                | PutA, trifunctional transcriptional regulator/proline dehydrogenase/L-glutamate gamma-semialdehyde dehydrogenase | transcription regulation / amino acid biosynthesis          | 2.34     | 0.28  | 2.94E-07 |
| RS05275                | iron permease FTR1                                                                                               | iron transport                                              | -2.16    | 0.40  | 1.92E-02 |
| RS05850                | NhaA, Na <sup>+</sup> /H <sup>+</sup> antiporter                                                                 | sodium ion transport                                        | 2.02     | 0.22  | 8.06E-08 |
| RS05855                | NhaR, transcriptional activator                                                                                  | transcription regulation / sodium ion transport             | 1.35     | 0.15  | 2.24E-04 |
| RS06280                | PdhR, pyruvate dehydrogenase complex transcriptional repressor                                                   | transcription regulation / pyruvate dehydrogenase           | -1.68    | 0.29  | 2.93E-02 |
| RS06285                | AceE, pyruvate dehydrogenase (acetyl-transferring), homodimeric type                                             | pyruvate dehydrogenase                                      | -1.40    | 0.20  | 1.46E-02 |
| RS07090                | DUF2502 domain-containing protein                                                                                | unknown                                                     | 1.56     | 0.27  | 4.87E-02 |



| ORF (CWC46 )          | Function                                                                          | GO molecular function                                       | log2(FC) | lfcSE | padj     |
|-----------------------|-----------------------------------------------------------------------------------|-------------------------------------------------------------|----------|-------|----------|
| RS07105               | DUF1107 domain-containing protein                                                 | unknown                                                     | 1.88     | 0.17  | 1.43E-10 |
| RS07620               | FadE, acyl-CoA dehydrogenase                                                      | fatty acid metabolism                                       | 1.40     | 0.21  | 1.84E-02 |
| RS10685               | DUF2002 domain-containing protein                                                 | unknown                                                     | 2.61     | 0.30  | 5.37E-08 |
| RS10950               | hypothetical protein                                                              | unknown                                                     | 2.46     | 0.36  | 1.94E-04 |
| RS11860               | glycine zipper 2TM domain-containing protein                                      | outer membrane                                              | 2.39     | 0.46  | 2.21E-02 |
| RS12150               | esterase                                                                          | carbohydrate metabolism                                     | -2.16    | 0.39  | 1.46E-02 |
| RS15300               | CutC, copper homeostasis protein                                                  | copper ion homeostasis                                      | 1.17     | 0.15  | 1.71E-02 |
| RS16060               | FrmA, S-(hydroxymethyl)glutathione dehydrogenase/class III alcohol dehydrogenase  | glutathione biosynthesis                                    | 1.41     | 0.20  | 1.46E-02 |
| RS16065               | FghA, S-formylglutathione hydrolase                                               | glutathione biosynthesis                                    | 1.40     | 0.22  | 3.98E-02 |
| RS16520               | LamB/YcsF family protein                                                          | carbohydrate metabolism                                     | 1.63     | 0.24  | 4.03E-03 |
| RS18615               | ABC transporter substrate-binding protein                                         | transport                                                   | -3.20    | 0.57  | 2.12E-03 |
| RS18620               | TonB-dependent siderophore receptor                                               | siderophore transport                                       | -2.58    | 0.51  | 1.92E-02 |
| RS18680               | MenD, 2-succinyl-5-enolpyruvyl-6-hydroxy-3-cyclohexene-1-carboxylic-acid synthase | menaquinone biosynthesis                                    | 1.33     | 0.18  | 1.46E-02 |
| RS18685               | MenF, isochorismate synthase                                                      | menaquinone biosynthesis                                    | 1.24     | 0.14  | 6.43E-04 |
| RS21855               | ABC transporter substrate-binding protein                                         | polyamine transport                                         | 1.52     | 0.24  | 2.59E-02 |
| <b>Late infection</b> |                                                                                   |                                                             |          |       |          |
| RS00005               | AspA, aspartate ammonia-lyase                                                     | TCA cycle                                                   | -1.25    | 0.18  | 1.09E-02 |
| RS00015               | anaerobic C4-dicarboxylate transporter                                            | C4-dicarboxylate transport                                  | -1.49    | 0.19  | 2.98E-04 |
| RS01325               | XylR, xylose operon transcription regulator                                       | transcription regulation                                    | 1.25     | 0.19  | 3.09E-02 |
| RS01395               | HAMP domain-containing protein                                                    | chemotaxis                                                  | -1.40    | 0.23  | 1.94E-02 |
| RS01725               | ABC transporter ATP-binding protein                                               | peptide transport                                           | 1.47     | 0.26  | 2.82E-02 |
| RS01730               | L-Ala-D/L-Glu epimerase                                                           | amino acid catabolism                                       | 1.63     | 0.24  | 9.06E-04 |
| RS01970               | carbon starvation protein A                                                       | cellular response to starvation                             | -4.49    | 0.27  | 1.56E-45 |
| RS01975               | phosphoenolpyruvate carboxylase                                                   | TCA cycle                                                   | 1.22     | 0.10  | 2.46E-08 |
| RS02115               | LigB, NAD-dependent DNA ligase                                                    | DNA replication                                             | 1.60     | 0.29  | 2.32E-02 |
| RS02180               | nitrogen regulation protein NR(II)                                                | transcription regulation / phosphorelay signal transduction | -0.98    | 0.12  | 4.57E-02 |
| RS03125               | malate permease                                                                   | organic anion transport                                     | -3.43    | 0.78  | 1.47E-02 |

| ORF (CWC46 ) | Function                                                                                                         | GO molecular function                                                      | log2(FC) | lfcSE | padj     |
|--------------|------------------------------------------------------------------------------------------------------------------|----------------------------------------------------------------------------|----------|-------|----------|
| RS03335      | GntP family transporter                                                                                          | gluconate transport                                                        | -1.41    | 0.24  | 2.82E-02 |
| RS03345      | aldolase                                                                                                         | unknown                                                                    | -1.45    | 0.20  | 1.38E-03 |
| RS03355      | NAD(P)-dependent oxidoreductase                                                                                  | redox activity                                                             | -1.41    | 0.25  | 3.64E-02 |
| RS03495      | agmatine deiminase                                                                                               | putrescine biosynthesis                                                    | 1.95     | 0.28  | 1.10E-04 |
| RS03720      | ilv operon leader peptide                                                                                        | branched-chain amino acid biosynthesis                                     | 1.78     | 0.35  | 2.82E-02 |
| RS03725      | acetolactate synthase 2 catalytic subunit                                                                        | branched-chain amino acid biosynthesis                                     | 2.26     | 0.25  | 5.40E-09 |
| RS03730      | acetolactate synthase 2 small subunit                                                                            | branched-chain amino acid biosynthesis                                     | 1.44     | 0.22  | 5.15E-03 |
| RS03770      | PutA, trifunctional transcriptional regulator/proline dehydrogenase/L-glutamate gamma-semialdehyde dehydrogenase | transcription regulation / amino acid biosynthesis                         | 2.89     | 0.22  | 5.53E-23 |
| RS05535      | YjeF, bifunctional ADP-dependent NAD(P)H-hydrate dehydratase/NAD(P)H-hydrate epimerase                           | nucleotide metabolism                                                      | 1.79     | 0.35  | 2.63E-02 |
| RS05725      | oxidative stress defence protein                                                                                 | oxidative stress                                                           | 1.17     | 0.12  | 2.65E-04 |
| RS05795      | bifunctional aspartate kinase/homoserine dehydrogenase I                                                         | L-lysine, L-methionine, L-threonine biosynthesis / amino acid biosynthesis | 1.22     | 0.19  | 3.17E-02 |
| RS05840      | DnaK, molecular chaperone                                                                                        | heat shock response/ protein folding                                       | 1.88     | 0.29  | 9.06E-04 |
| RS05845      | DnaJ, molecular chaperone                                                                                        | heat shock response/ protein folding                                       | 1.77     | 0.29  | 2.86E-03 |
| RS05850      | NhaA, Na <sup>+</sup> /H <sup>+</sup> antiporter                                                                 | sodium ion transport                                                       | 1.95     | 0.17  | 1.60E-12 |
| RS05855      | NhaR, transcriptional activator                                                                                  | transcription regulation / sodium ion transport                            | 1.07     | 0.14  | 2.32E-02 |
| RS06280      | PdhR, pyruvate dehydrogenase complex transcriptional repressor                                                   | transcription regulation / pyruvate dehydrogenase                          | -1.39    | 0.19  | 1.61E-03 |
| RS06285      | AceE, pyruvate dehydrogenase (acetyl-transferring), homodimeric type                                             | pyruvate dehydrogenase                                                     | -1.43    | 0.12  | 9.85E-10 |
| RS06290      | pyruvate dehydrogenase complex dihydrolipoyllysine-residue acetyltransferase                                     | pyruvate dehydrogenase                                                     | -1.23    | 0.17  | 6.06E-03 |
| RS07090      | DUF2502 domain-containing protein                                                                                | unknown                                                                    | 2.39     | 0.18  | 5.78E-21 |
| RS07105      | DUF1107 domain-containing protein                                                                                | unknown                                                                    | 1.94     | 0.21  | 3.50E-08 |
| RS07300      | CysJ, NADPH-dependent assimilatory sulfite reductase flavoprotein subunit                                        | cysteine biosynthesis / amino acid biosynthesis                            | 1.91     | 0.41  | 4.57E-02 |
| RS09040      | inositol-1-monophosphatase                                                                                       | inositol phosphate dephosphorylation                                       | -1.27    | 0.18  | 8.35E-03 |
| RS09050      | IscR, Fe-S cluster assembly transcriptional regulator                                                            | regulation of transcription                                                | 1.66     | 0.22  | 1.40E-04 |
| RS09545      | transmembrane protein                                                                                            | membrane                                                                   | 1.24     | 0.12  | 2.13E-05 |
| RS09860      | ManC, mannose-1-phosphate guanylyltransferase/mannose-6-phosphate isomerase                                      | LPS biosynthesis                                                           | 1.17     | 0.17  | 2.48E-02 |
| RS10405      | acetate kinase                                                                                                   | organic acid metabolism                                                    | -1.11    | 0.13  | 2.16E-03 |
| RS10615      | HydA, hydrogenase (NiFe) small subunit                                                                           | redox activity                                                             | -1.95    | 0.33  | 2.69E-03 |

| ORF (CWC46 ) | Function                                                     | GO molecular function                            | log2(FC) | lfcSE | padj     |
|--------------|--------------------------------------------------------------|--------------------------------------------------|----------|-------|----------|
| RS10685      | DUF2002 domain-containing protein                            | unknown                                          | 4.10     | 0.24  | 1.57E-46 |
| RS10690      | hypothetical protein                                         | unknown                                          | 3.65     | 0.74  | 2.86E-03 |
| RS10950      | hypothetical protein                                         | unknown                                          | 2.10     | 0.29  | 2.94E-05 |
| RS10955      | sugar ABC transporter permease                               | sugar transport                                  | 2.22     | 0.32  | 8.23E-05 |
| RS11350      | FliH, flagellar transcriptional regulator                    | transcriptional regulation of flagellum assembly | -1.45    | 0.19  | 5.57E-04 |
| RS11375      | HAMP domain-containing protein                               | chemotaxis                                       | -1.11    | 0.15  | 2.25E-02 |
| RS11380      | CheR, protein-glutamate O-methyltransferase                  | chemotaxis                                       | -0.95    | 0.11  | 3.32E-02 |
| RS11400      | FliH, flagellar type III secretion system protein            | flagellum assembly                               | -1.09    | 0.12  | 3.36E-03 |
| RS11430      | FlgB, flagellar basal body rod protein                       | flagellum assembly                               | -1.19    | 0.18  | 4.15E-02 |
| RS11540      | FliG, flagellar motor switch protein                         | flagellum assembly                               | -1.20    | 0.19  | 3.68E-02 |
| RS11545      | FliF, flagellar basal body M-ring protein FliF               | flagellum assembly                               | -1.11    | 0.16  | 4.36E-02 |
| RS11550      | FliE, flagellar hook-basal body complex protein FliE         | flagellum assembly                               | -1.27    | 0.16  | 1.17E-03 |
| RS11580      | hypothetical protein                                         | unknown                                          | -1.12    | 0.13  | 3.82E-03 |
| RS11585      | DegT/DnrJ/EryC1/StrS family aminotransferase                 | transaminase activity                            | -1.13    | 0.16  | 3.10E-02 |
| RS11860      | glycine zipper 2TM domain-containing protein                 | outer membrane                                   | 3.89     | 0.32  | 2.72E-22 |
| RS12135      | PTS beta-glucoside transporter subunit IIABC                 | transport                                        | -2.46    | 0.38  | 1.16E-04 |
| RS12140      | 6-phospho-beta-glucosidase                                   | carbohydrate metabolism                          | -2.77    | 0.35  | 1.68E-07 |
| RS12145      | carbohydrate porin                                           | transport                                        | -3.19    | 0.49  | 1.91E-05 |
| RS12150      | esterase                                                     | carbohydrate metabolism                          | -3.34    | 0.36  | 2.25E-11 |
| RS12155      | hypothetical protein                                         | unknown                                          | -3.00    | 0.47  | 5.99E-05 |
| RS12185      | non-ribosomal peptide synthetase                             | catalytic activity                               | -1.47    | 0.25  | 1.94E-02 |
| RS12280      | DUF2091 domain-containing protein                            | unknown                                          | 1.54     | 0.24  | 5.24E-03 |
| RS12340      | osmotically-inducible lipoprotein OsmB                       | oxidative stress                                 | 1.72     | 0.28  | 3.91E-03 |
| RS12875      | ShlB/FhaC/HecB family hemolysin secretion/activation protein | protein transport                                | -1.29    | 0.20  | 1.94E-02 |
| RS13350      | NAD(P)(+) transhydrogenase (Re/Si-specific) subunit alpha    | redox activity                                   | 2.02     | 0.31  | 5.57E-04 |
| RS13355      | NAD(P)(+) transhydrogenase (Re/Si-specific) subunit beta     | redox activity                                   | 2.35     | 0.39  | 6.84E-04 |
| RS13465      | SfrC, virulence effector protein                             | virulence factor                                 | -1.13    | 0.15  | 1.50E-02 |

| ORF (CWC46 ) | Function                                       | GO molecular function              | log2(FC) | lfcSE | padj     |
|--------------|------------------------------------------------|------------------------------------|----------|-------|----------|
| RS13470      | SrfB, virulence protein                        | virulence factor                   | -1.15    | 0.17  | 3.55E-02 |
| RS13475      | hypothetical protein                           | virulence factor                   | -1.13    | 0.14  | 8.20E-03 |
| RS13630      | MFS transporter                                | transport                          | 2.36     | 0.43  | 2.86E-03 |
| RS13785      | DtpA, dipeptide/tripeptide permease            | peptide transport                  | -1.81    | 0.35  | 2.63E-02 |
| RS14540      | 23S rRNA (guanine(745)-N(1))-methyltransferase | rRNA methylation / rRNA processing | -1.15    | 0.16  | 1.77E-02 |
| RS14885      | FkbM family methyltransferase                  | unknown                            | -1.10    | 0.15  | 3.52E-02 |
| RS15300      | CutC, copper homeostasis protein               | copper ion homeostasis             | 1.27     | 0.16  | 2.29E-03 |
| RS15650      | FAA hydrolase family protein                   | catalytic activity                 | -1.38    | 0.18  | 1.38E-03 |
| RS15655      | hypothetical protein                           | organic anion transport            | -2.19    | 0.28  | 3.63E-06 |
| RS15675      | hypothetical protein                           | catalytic activity                 | 1.56     | 0.30  | 4.31E-02 |
| RS15785      | DmsD, Tat proofreading chaperone               | protein folding                    | 1.53     | 0.20  | 3.75E-04 |
| RS15945      | DUF2593 domain-containing protein              | unknown                            | 1.88     | 0.37  | 2.32E-02 |
| RS16005      | serine hydrolase                               | proteolysis                        | 1.28     | 0.16  | 9.18E-04 |
| RS16160      | DUF2807 domain-containing protein              | unknown                            | 1.50     | 0.26  | 2.32E-02 |
| RS16165      | cytochrome P450                                | redox activity                     | 1.63     | 0.25  | 2.29E-03 |
| RS16175      | hypothetical protein                           | unknown                            | 1.40     | 0.24  | 3.32E-02 |
| RS16270      | hypothetical protein                           | unknown                            | 1.46     | 0.16  | 1.49E-05 |
| RS16275      | ABC transporter ATP-binding protein            | transport                          | 1.39     | 0.24  | 3.90E-02 |
| RS16280      | hypothetical protein                           | unknown                            | 1.48     | 0.26  | 2.82E-02 |
| RS16385      | hypothetical protein                           | unknown                            | -1.99    | 0.35  | 3.39E-03 |
| RS16390      | hypothetical protein                           | unknown                            | -2.19    | 0.48  | 3.78E-02 |
| RS16540      | hypothetical protein                           | unknown                            | 1.31     | 0.14  | 1.91E-05 |
| RS17240      | anaerobic C4-dicarboxylate transporter         | C4-dicarboxylate transport         | -1.41    | 0.22  | 1.09E-02 |
| RS17330      | alanyl-tRNA editing protein                    | tRNA aminoacylation                | -1.75    | 0.27  | 1.09E-03 |
| RS18075      | cytochrome bd-I ubiquinol oxidase subunit I    | aerobic electron transport chain   | -1.59    | 0.26  | 7.35E-03 |
| RS18615      | ABC transporter substrate-binding protein      | transport                          | -2.49    | 0.51  | 1.09E-02 |
| RS18620      | TonB-dependent siderophore receptor            | siderophore transport              | -2.18    | 0.42  | 8.42E-03 |

| ORF (CWC46_) | Function                                                                          | GO molecular function                         | log2(FC) | lfcSE | padj     |
|--------------|-----------------------------------------------------------------------------------|-----------------------------------------------|----------|-------|----------|
| RS18660      | MenE, o-succinylbenzoate--CoA ligase                                              | menaquinone biosynthesis                      | 1.71     | 0.24  | 5.24E-04 |
| RS18665      | MenC, o-succinylbenzoate synthase                                                 | menaquinone biosynthesis                      | 1.63     | 0.27  | 6.06E-03 |
| RS18670      | MenB, 1, 4-dihydroxy-2-naphthoyl-CoA synthase                                     | menaquinone biosynthesis                      | 1.73     | 0.27  | 1.70E-03 |
| RS18675      | MenH, 2-succinyl-6-hydroxy-2%2C4-cyclohexadiene-1-carboxylate synthase            | menaquinone biosynthesis                      | 1.88     | 0.26  | 1.25E-04 |
| RS18680      | MenD, 2-succinyl-5-enolpyruvyl-6-hydroxy-3-cyclohexene-1-carboxylic-acid synthase | menaquinone biosynthesis                      | 1.66     | 0.15  | 2.47E-10 |
| RS18685      | MenF, isochorismate synthase                                                      | menaquinone biosynthesis                      | 1.61     | 0.10  | 2.72E-22 |
| RS18725      | NrdA, ribonucleoside-diphosphate reductase subunit alpha                          | DNA replication                               | 1.26     | 0.17  | 3.84E-03 |
| RS20365      | IS1 family transposase                                                            | transposition                                 | -2.43    | 0.48  | 8.42E-03 |
| RS20700      | PigA, butyryl-CoA dehydrogenase                                                   | antibiotic biosynthesis                       | 1.82     | 0.37  | 3.97E-02 |
| RS21305      | lolD, 3D-(3%2C5/4)-trihydroxycyclohexane-1%2C2-dione acylhydrolase (decyclizing)  | inositol catabolism                           | 1.31     | 0.22  | 4.15E-02 |
| RS21820      | acetolactate synthase AlsS                                                        | valine biosynthesis / amino acid biosynthesis | 1.17     | 0.18  | 4.77E-02 |
| RS21855      | hypothetical protein                                                              | unknown                                       | 1.64     | 0.23  | 5.00E-04 |
| RS22235      | hypothetical protein                                                              | unknown                                       | 1.79     | 0.20  | 6.19E-07 |
| RS22565      | OsmY, molecular chaperone                                                         | protein folding                               | 1.57     | 0.14  | 1.96E-10 |
| RS22725      | MFS transporter                                                                   | transport                                     | -1.43    | 0.21  | 2.96E-03 |
| RS22750      | LysR family transcriptional regulator                                             | transcriptional regulation                    | -1.36    | 0.13  | 2.85E-07 |

**Table S8. Genes differentially expressed in *Serratia* I-E anti-JS26 strain**

| DE in strains          | locus_tag | product                                                 | GO molecular function                     | log <sub>2</sub> (FC) | lfcSE | padj     |
|------------------------|-----------|---------------------------------------------------------|-------------------------------------------|-----------------------|-------|----------|
| <b>Early infection</b> |           |                                                         |                                           |                       |       |          |
| wt, I-E, I-F           | RS02465   | ribose ABC transporter permease                         | sugar transport                           | 1.71                  | 0.26  | 9.54E-03 |
| wt, I-E, I-F           | RS10625   | Ni/Fe-hydrogenase cytochrome b subunit                  | anaerobic respiration                     | 2.82                  | 0.54  | 1.32E-02 |
| wt, I-E, I-F           | RS12610   | NarH, nitrate reductase subunit beta                    | nitrate reductase activity                | 2.72                  | 0.44  | 8.89E-04 |
| wt, I-E                | RS12605   | NarG, nitrate reductase subunit alpha                   | nitrate reductase activity                | 2.56                  | 0.40  | 8.89E-04 |
| wt, I-E                | RS18585   | GalS, HTH-type transcriptional regulator                | transcriptional regulation                | -3.38                 | 0.44  | 4.99E-07 |
| wt, I-E                | RS21500   | hypothetical protein                                    | unknown                                   | 2.45                  | 0.41  | 3.83E-03 |
| I-E, I-F               | RS00965   | FadB, fatty acid oxidation complex subunit alpha        | fatty acid metabolism                     | -2.37                 | 0.41  | 8.27E-03 |
| I-E, I-F               | RS02455   | ribokinase                                              | D-ribose metabolism                       | 1.69                  | 0.28  | 2.34E-02 |
| I-E, I-F               | RS02475   | RbsD, D-ribose pyranase                                 | monosaccharide metabolism                 | 1.89                  | 0.33  | 2.66E-02 |
| I-E, I-F               | RS10190   | FadL, long-chain fatty acid transporter                 | fatty acid transport                      | -3.29                 | 0.41  | 1.11E-07 |
| I-E                    | RS00220   | LysR family transcriptional regulator                   | transcriptional regulation                | -2.64                 | 0.50  | 1.37E-02 |
| I-E                    | RS00970   | FadA, acetyl-CoA C-acyltransferase                      | fatty acid metabolism                     | -2.06                 | 0.38  | 2.66E-02 |
| I-E                    | RS01640   | PtsN, PTS IIA-like nitrogen-regulatory protein          | regulation of ion transmembrane transport | -1.74                 | 0.31  | 4.37E-02 |
| I-E                    | RS02470   | RbsA, ribose ABC transporter ATP-binding protein        | sugar transport                           | 2.37                  | 0.33  | 1.15E-04 |
| I-E                    | RS05265   | FCD domain-containing protein                           | transcriptional regulation                | -3.34                 | 0.65  | 9.99E-03 |
| I-E                    | RS07620   | FadE, acyl-CoA dehydrogenase                            | fatty acid metabolism                     | -1.65                 | 0.28  | 3.17E-02 |
| I-E                    | RS10010   | GspB, type II secretion system assembly factor          | protein secretion                         | -1.91                 | 0.32  | 1.32E-02 |
| I-E                    | RS13615   | LysR family transcriptional regulator                   | transcriptional regulation                | -1.90                 | 0.36  | 4.37E-02 |
| I-E                    | RS17740   | amino acid adenylation domain protein                   | nucleotidyltransferase activity           | -1.59                 | 0.24  | 1.32E-02 |
| I-E                    | RS19320   | methyl-accepting chemotaxis protein                     | chemotaxis                                | -1.37                 | 0.20  | 1.67E-02 |
| I-E                    | RS22460   | sigma-54-dependent Fis family transcriptional regulator | transcriptional regulation                | -2.16                 | 0.43  | 4.37E-02 |
| <b>Mid-infection</b>   |           |                                                         |                                           |                       |       |          |
| wt, I-E, I-F           | RS05850   | NhaA, Na <sup>+</sup> /H <sup>+</sup> antiporter        | sodium transport                          | 2.13                  | 0.30  | 8.18E-05 |
| wt, I-E, I-F           | RS05855   | NhaR, transcriptional activator                         | sodium transport                          | 1.47                  | 0.20  | 1.62E-03 |
| wt, I-E, I-F           | RS07090   | DUF2502 domain-containing protein                       | unknown                                   | 2.30                  | 0.31  | 1.49E-05 |

| DE in strains | locus_tag | product                                                         | GO molecular function                                   | log <sub>2</sub> (FC) | lfcSE | padj     |
|---------------|-----------|-----------------------------------------------------------------|---------------------------------------------------------|-----------------------|-------|----------|
| wt, I-E, I-F  | RS10685   | DUF2002 domain-containing protein                               | unknown                                                 | 3.20                  | 0.44  | 1.31E-06 |
| wt, I-E, I-F  | RS18615   | ABC transporter substrate-binding protein                       | transporter                                             | -4.16                 | 0.69  | 7.14E-05 |
| wt, I-E, I-F  | RS18685   | MenF, isochorismate synthase                                    | menaquinone biosynthesis                                | 1.88                  | 0.20  | 6.62E-08 |
| wt, I-E       | RS05275   | iron permease FTR1                                              | iron transport                                          | -3.02                 | 0.49  | 1.88E-04 |
| wt, I-E       | RS07105   | DUF1107 domain-containing protein                               | unknown                                                 | 1.59                  | 0.21  | 3.61E-04 |
| wt, I-E       | RS18620   | TonB-dependent siderophore receptor                             | siderophore transport                                   | -3.82                 | 0.64  | 9.40E-05 |
| I-E, I-F      | RS07645   | DNA polymerase IV                                               | DNA repair / SOS response                               | 2.12                  | 0.30  | 9.40E-05 |
| I-E, I-F      | RS08295   | RecA, recombinase                                               | DNA repair / SOS response                               | 2.53                  | 0.39  | 1.79E-04 |
| I-E, I-F      | RS08300   | RecX, recombination regulator                                   | DNA repair / SOS response                               | 2.11                  | 0.31  | 1.91E-04 |
| I-E, I-F      | RS08850   | RseA, anti-sigma-E factor                                       | anti-sigma binding                                      | 1.51                  | 0.17  | 2.08E-05 |
| I-E, I-F      | RS09495   | SulA, cell division inhibitor                                   | cellular response to DNA damage stimulus / SOS response | 2.62                  | 0.25  | 1.12E-12 |
| I-E, I-F      | RS14825   | hypothetical protein                                            | unknown                                                 | 2.54                  | 0.36  | 1.49E-05 |
| I-E, I-F      | RS21055   | RecN, DNA repair protein                                        | DNA repair/ SOS response                                | 3.12                  | 0.30  | 2.78E-13 |
| I-E, I-F      | RS21370   | DinI family protein                                             | DNA repair/ SOS response                                | 1.82                  | 0.33  | 1.33E-02 |
| I-E, I-F      | RS22350   | LexA, repressor                                                 | DNA repair / SOS response                               | 1.78                  | 0.19  | 1.46E-07 |
| I-E           | RS01460   | tripartite tricarboxylate transporter substrate binding protein | transport                                               | -2.16                 | 0.37  | 2.92E-03 |
| I-E           | RS01920   | polysaccharide deacetylase                                      | carbohydrate metabolism                                 | -1.67                 | 0.25  | 2.43E-03 |
| I-E           | RS01925   | MFS transporter                                                 | transport                                               | -1.78                 | 0.28  | 2.90E-03 |
| I-E           | RS01930   | NAD(P)-dependent oxidoreductase                                 | redox activity                                          | -1.64                 | 0.29  | 2.52E-02 |
| I-E           | RS03205   | dicarboxylate/amino acid:cation symporter                       | transporter                                             | -2.08                 | 0.42  | 3.29E-02 |
| I-E           | RS05985   | DNA polymerase II                                               | DNA repair / SOS response                               | 1.46                  | 0.21  | 3.89E-03 |
| I-E           | RS06370   | sugar ABC transporter substrate-binding protein                 | sugar transport                                         | -2.93                 | 0.51  | 7.16E-04 |
| I-E           | RS06375   | sugar ABC transporter permease                                  | sugar transport                                         | -3.08                 | 0.59  | 3.23E-03 |
| I-E           | RS06380   | carbohydrate ABC transporter permease                           | sugar transport                                         | -2.64                 | 0.58  | 2.85E-02 |
| I-E           | RS06810   | aldolase                                                        | catalytic activity                                      | -3.30                 | 0.74  | 1.90E-02 |
| I-E           | RS06815   | ATP-grasp domain-containing protein                             | TCA cycle                                               | -3.07                 | 0.59  | 2.92E-03 |
| I-E           | RS06820   | LucA, siderophore biosynthesis protein                          | siderophore biosynthesis                                | -2.88                 | 0.54  | 2.90E-03 |

| DE in strains | locus_tag | product                                                                | GO molecular function                                                                             | log <sub>2</sub> (FC) | lfcSE | padj     |
|---------------|-----------|------------------------------------------------------------------------|---------------------------------------------------------------------------------------------------|-----------------------|-------|----------|
| I-E           | RS06825   | MFS transporter                                                        | transport                                                                                         | -2.70                 | 0.62  | 4.99E-02 |
| I-E           | RS06850   | IS200/IS605 family transposase                                         | DNA recombination/ transposition                                                                  | -2.21                 | 0.48  | 4.64E-02 |
| I-E           | RS08845   | RpoE, RNA polymerase sigma factor                                      | transcriptional regulation / envelope stress response                                             | 1.28                  | 0.17  | 2.90E-03 |
| I-E           | RS08855   | RseB, sigma-E factor regulatory protein                                | anti-sigma binding / regulation of polysaccharide biosynthetic process / envelope stress response | 1.20                  | 0.16  | 9.81E-03 |
| I-E           | RS10855   | ABC transporter ATP-binding protein                                    | transport                                                                                         | -3.54                 | 0.61  | 2.21E-04 |
| I-E           | RS10860   | ABC transporter permease                                               | transport                                                                                         | -3.28                 | 0.56  | 3.23E-04 |
| I-E           | RS10865   | ABC transporter permease                                               | transport                                                                                         | -3.72                 | 0.56  | 1.04E-05 |
| I-E           | RS10870   | EntS, enterobactin transporter                                         | cellular response to DNA damage stimulus / response to antibiotic                                 | -3.29                 | 0.59  | 7.39E-04 |
| I-E           | RS12165   | SbnA, 2,3-diaminopropionate biosynthesis protein                       | siderophore biosynthesis                                                                          | -1.67                 | 0.30  | 2.80E-02 |
| I-E           | RS13735   | arabinose ABC transporter substrate-binding protein                    | transport                                                                                         | -1.88                 | 0.33  | 7.61E-03 |
| I-E           | RS13920   | OppF, oligopeptide ABC transporter ATP-binding protein                 | protein transport                                                                                 | -1.63                 | 0.17  | 1.60E-07 |
| I-E           | RS13925   | OppD, oligopeptide ABC transporter ATP-binding protein OppD            | protein transport                                                                                 | -1.61                 | 0.21  | 2.54E-04 |
| I-E           | RS14775   | ferrous iron transport protein A                                       | iron transport / cellular response to DNA damage stimulus                                         | -2.21                 | 0.41  | 8.36E-03 |
| I-E           | RS16865   | alcohol dehydrogenase                                                  | redox activity                                                                                    | -1.66                 | 0.32  | 4.99E-02 |
| I-E           | RS17020   | hypothetical protein                                                   | unknown                                                                                           | -2.64                 | 0.53  | 9.81E-03 |
| I-E           | RS17315   | cysteine synthase family protein                                       | amino acid biosynthesis                                                                           | -1.48                 | 0.22  | 3.89E-03 |
| I-E           | RS17750   | chlorinating enzyme                                                    | unknown                                                                                           | -1.89                 | 0.25  | 4.76E-05 |
| I-E           | RS17755   | hypothetical protein                                                   | unknown                                                                                           | -1.64                 | 0.29  | 2.29E-02 |
| I-E           | RS17760   | EamA/RhaT family transporter                                           | transport                                                                                         | -1.63                 | 0.27  | 9.81E-03 |
| I-E           | RS17765   | thioesterase                                                           | hydrolase activity                                                                                | -1.85                 | 0.27  | 3.61E-04 |
| I-E           | RS18320   | glutamate/aspartate ABC transporter substrate-binding protein          | amino acid transport                                                                              | -1.69                 | 0.30  | 1.77E-02 |
| I-E           | RS18585   | GalS, HTH-type transcriptional regulator                               | transcriptional regulation                                                                        | -2.60                 | 0.51  | 8.36E-03 |
| I-E           | RS18590   | MglB, galactose/glucose ABC transporter substrate-binding protein      | sugar transport                                                                                   | -2.77                 | 0.39  | 1.42E-05 |
| I-E           | RS18595   | MglA, galactose/methyl galactoside ABC transporter ATP-binding protein | sugar transport                                                                                   | -2.88                 | 0.58  | 7.85E-03 |
| I-E           | RS18600   | MglC, galactose/methyl galactoside ABC transporter permease            | sugar transport                                                                                   | -3.08                 | 0.62  | 5.42E-03 |
| I-E           | RS19145   | PhoB, phosphate regulon transcriptional regulatory protein             | transcription regulation                                                                          | 1.57                  | 0.25  | 9.81E-03 |
| I-E           | RS20365   | IS1 family transposase                                                 | transposition                                                                                     | -3.18                 | 0.59  | 1.60E-03 |



| DE in strains         | locus_tag | product                                                                           | GO molecular function                        | log <sub>2</sub> (FC) | lfcSE | padj     |
|-----------------------|-----------|-----------------------------------------------------------------------------------|----------------------------------------------|-----------------------|-------|----------|
| I-E                   | RS21295   | sugar ABC transporter substrate-binding protein                                   | sugar transport                              | -2.10                 | 0.40  | 1.24E-02 |
| I-E                   | RS21500   | hypothetical protein                                                              | unknown                                      | 2.41                  | 0.38  | 3.29E-04 |
| I-E                   | RS22190   | malate dehydrogenase                                                              | TCA cycle / anaerobic respiration            | -1.32                 | 0.20  | 1.82E-02 |
| I-E                   | RS22235   | RcnB, Nickel/cobalt homeostasis protein                                           | cellular response to DNA damage              | 1.39                  | 0.23  | 3.42E-02 |
| <b>Late infection</b> |           |                                                                                   |                                              |                       |       |          |
| wt, I-E, I-F          | RS05850   | NhaA, Na <sup>+</sup> /H <sup>+</sup> antiporter                                  | sodium transport                             | 1.75                  | 0.26  | 1.24E-03 |
| wt, I-E, I-F          | RS07090   | DUF2502 domain-containing protein                                                 | unknown                                      | 2.78                  | 0.27  | 7.97E-14 |
| wt, I-E, I-F          | RS07105   | DUF1107 domain-containing protein                                                 | unknown                                      | 2.11                  | 0.18  | 3.44E-14 |
| wt, I-E, I-F          | RS09545   | YccA, transmembrane protein                                                       | negative regulation of apoptosis             | 1.47                  | 0.26  | 4.01E-02 |
| wt, I-E, I-F          | RS09860   | mannose-1-phosphate guanylyltransferase/mannose-6-phosphate isomerase             | polysaccharide biosynthetic process          | 1.27                  | 0.17  | 4.38E-03 |
| wt, I-E, I-F          | RS10685   | DUF2002 domain-containing protein                                                 | unknown                                      | 4.61                  | 0.38  | 3.45E-23 |
| wt, I-E, I-F          | RS10690   | hypothetical protein                                                              | unknown                                      | 4.45                  | 0.76  | 1.04E-04 |
| wt, I-E, I-F          | RS11860   | glycine zipper 2TM domain-containing protein                                      | unknown                                      | 3.49                  | 0.65  | 1.24E-03 |
| wt, I-E, I-F          | RS12140   | 6-phospho-beta-glucosidase                                                        | carbohydrate metabolism                      | -3.40                 | 0.60  | 6.41E-04 |
| wt, I-E, I-F          | RS12150   | esterase                                                                          | carbohydrate metabolism                      | -3.39                 | 0.59  | 4.70E-04 |
| wt, I-E, I-F          | RS12155   | hypothetical protein                                                              | unknown                                      | -3.26                 | 0.65  | 4.39E-03 |
| wt, I-E, I-F          | RS12340   | OsmB, osmotically-inducible lipoprotein                                           | osmotic stress                               | 2.25                  | 0.39  | 2.20E-03 |
| wt, I-E, I-F          | RS15300   | CutC, copper homeostasis protein                                                  | copper homeostasis                           | 1.32                  | 0.18  | 4.75E-03 |
| wt, I-E, I-F          | RS15785   | DmsD, Tat proofreading chaperone                                                  | protein folding                              | 1.92                  | 0.22  | 6.77E-07 |
| wt, I-E, I-F          | RS16005   | serine hydrolase                                                                  | proteolysis                                  | 1.65                  | 0.31  | 3.29E-02 |
| wt, I-E, I-F          | RS16385   | hypothetical protein                                                              | unknown                                      | -2.34                 | 0.39  | 1.17E-03 |
| wt, I-E, I-F          | RS18680   | MenD, 2-succinyl-5-enolpyruvyl-6-hydroxy-3-cyclohexene-1-carboxylic-acid synthase | menaquinone biosynthesis                     | 1.75                  | 0.32  | 1.89E-02 |
| wt, I-E, I-F          | RS18685   | MenF, isochorismate synthase                                                      | menaquinone biosynthesis                     | 1.98                  | 0.13  | 1.17E-22 |
| wt, I-E, I-F          | RS22235   | hypothetical protein                                                              | unknown                                      | 1.99                  | 0.26  | 1.47E-05 |
| wt, I-E, I-F          | RS22565   | OsmY, molecular chaperone                                                         | protein folding / Response to osmotic stress | 1.85                  | 0.29  | 1.40E-03 |
| wt, I-E               | RS05725   | oxidative stress defence protein                                                  | Oxidative stress response                    | 1.50                  | 0.24  | 1.27E-02 |
| wt, I-E               | RS05840   | DnaK, molecular chaperone                                                         | protein folding                              | 1.70                  | 0.29  | 9.73E-03 |

| DE in strains | locus_tag | product                                                      | GO molecular function                     | log <sub>2</sub> (FC) | lfcSE | padj     |
|---------------|-----------|--------------------------------------------------------------|-------------------------------------------|-----------------------|-------|----------|
| wt, I-E       | RS11350   | FliH, flagellar transcriptional regulator                    | flagella                                  | -1.47                 | 0.24  | 1.68E-02 |
| wt, I-E       | RS12145   | carbohydrate porin                                           | carbohydrate transport                    | -4.62                 | 1.19  | 4.21E-02 |
| wt, I-E       | RS12280   | DUF2091 domain-containing protein                            | unknown                                   | 1.61                  | 0.30  | 3.35E-02 |
| wt, I-E       | RS12875   | ShlB/FhaC/HecB family hemolysin secretion/activation protein | protein transport                         | -1.23                 | 0.19  | 4.01E-02 |
| wt, I-E       | RS16390   | hypothetical protein                                         | unknown                                   | -2.45                 | 0.40  | 6.41E-04 |
| wt, I-E       | RS16540   | hypothetical protein                                         | unknown                                   | 1.74                  | 0.29  | 7.71E-03 |
| wt, I-E       | RS17330   | alanyl-tRNA editing protein                                  | tRNA modification                         | -1.49                 | 0.26  | 3.29E-02 |
| I-E, I-F      | RS01685   | oligopeptidase A                                             | proteolysis                               | 1.22                  | 0.19  | 4.69E-02 |
| I-E, I-F      | RS03060   | IbpA, heat shock protein                                     | Heat shock response                       | 1.49                  | 0.26  | 3.61E-02 |
| I-E, I-F      | RS04105   | DNA helicase II                                              | DNA repair                                | 1.31                  | 0.21  | 3.29E-02 |
| I-E, I-F      | RS07645   | DinB, DNA polymerase IV                                      | DNA repair / SOS response                 | 2.21                  | 0.24  | 1.05E-08 |
| I-E, I-F      | RS08295   | RecA, recombinase                                            | DNA repair / SOS response                 | 2.91                  | 0.34  | 3.84E-09 |
| I-E, I-F      | RS08300   | RecX, recombination regulator                                | DNA repair / SOS response                 | 2.49                  | 0.27  | 7.58E-10 |
| I-E, I-F      | RS09495   | SulA, cell division inhibitor                                | SOS response                              | 2.62                  | 0.20  | 8.71E-22 |
| I-E, I-F      | RS09530   | HspQ, heat shock protein                                     | Heat shock response                       | 2.04                  | 0.27  | 3.27E-05 |
| I-E, I-F      | RS10830   | isochorismate synthase                                       | siderophore biosynthesis                  | -3.62                 | 0.75  | 5.76E-03 |
| I-E, I-F      | RS10845   | MbtH family protein                                          | siderophore biosynthesis                  | -3.60                 | 0.71  | 2.91E-03 |
| I-E, I-F      | RS10855   | ABC transporter ATP-binding protein                          | transport                                 | -3.45                 | 0.74  | 1.07E-02 |
| I-E, I-F      | RS13235   | stress protein                                               | tellurium resistance / response to stress | 1.48                  | 0.26  | 3.29E-02 |
| I-E, I-F      | RS13240   | TerD, tellurium resistance                                   | tellurium resistance / response to stress | 1.51                  | 0.22  | 3.59E-03 |
| I-E, I-F      | RS14825   | hypothetical protein                                         | unknown                                   | 3.13                  | 0.36  | 1.06E-09 |
| I-E, I-F      | RS15240   | RuvB, Holliday junction branch migration DNA helicase        | DNA repair/ SOS response                  | 1.33                  | 0.19  | 7.50E-03 |
| I-E, I-F      | RS16835   | 6-phospho-beta-glucosidase                                   | carbohydrate metabolism                   | -1.51                 | 0.21  | 2.02E-03 |
| I-E, I-F      | RS21055   | RecN, DNA repair protein                                     | DNA repair/ SOS response                  | 3.19                  | 0.23  | 2.24E-25 |
| I-E, I-F      | RS21370   | DinI family protein                                          | DNA repair/ SOS response                  | 2.06                  | 0.30  | 1.59E-04 |
| I-E, I-F      | RS22350   | LexA, repressor                                              | SOS response                              | 1.96                  | 0.17  | 4.37E-14 |
| I-E           | RS05025   | sucrose-6-phosphate hydrolase                                | sucrose metabolism                        | 1.29                  | 0.19  | 1.71E-02 |
| I-E           | RS05275   | iron permease FTR1                                           | iron transport                            | -3.04                 | 0.52  | 4.70E-04 |

| DE in strains | locus_tag | product                                          | GO molecular function                                             | log <sub>2</sub> (FC) | lfcSE | padj     |
|---------------|-----------|--------------------------------------------------|-------------------------------------------------------------------|-----------------------|-------|----------|
| I-E           | RS05280   | EfeM/EfeO family lipoprotein                     | unknown                                                           | -2.46                 | 0.49  | 1.14E-02 |
| I-E           | RS05985   | DNA polymerase II                                | DNA repair                                                        | 1.47                  | 0.18  | 1.42E-04 |
| I-E           | RS06540   | UvrA, excinuclease ABC subunit                   | DNA repair / SOS response                                         | 1.41                  | 0.21  | 8.94E-03 |
| I-E           | RS06820   | LucA, siderophore biosynthesis protein           | siderophore biosynthesis                                          | -3.17                 | 0.70  | 1.74E-02 |
| I-E           | RS06825   | MFS transporter                                  | siderophore biosynthesis                                          | -3.17                 | 0.76  | 4.01E-02 |
| I-E           | RS06855   | TonB-dependent siderophore receptor              | siderophore receptor                                              | -2.76                 | 0.63  | 3.82E-02 |
| I-E           | RS07775   | hypothetical protein                             | unknown                                                           | 2.07                  | 0.42  | 3.29E-02 |
| I-E           | RS07980   | RNA-directed DNA polymerase                      | RNA-dependent DNA replication                                     | -2.22                 | 0.44  | 1.73E-02 |
| I-E           | RS08430   | ClpB, ATP-dependent chaperone                    | protein folding / heat shock response                             | 1.07                  | 0.13  | 1.11E-02 |
| I-E           | RS08845   | RpoE, RNA polymerase sigma factor                | transcription regulation                                          | 1.07                  | 0.14  | 3.66E-02 |
| I-E           | RS08850   | RseA, anti-sigma-E factor                        | anti sigma factor                                                 | 1.16                  | 0.16  | 2.10E-02 |
| I-E           | RS10165   | hypothetical protein                             | unknown                                                           | -1.61                 | 0.28  | 1.71E-02 |
| I-E           | RS10825   | 2,3-dihydroxybenzoate-AMP ligase                 | siderophore biosynthesis                                          | -3.55                 | 0.77  | 1.11E-02 |
| I-E           | RS10835   | TonB-dependent siderophore receptor              | siderophore receptor                                              | -4.35                 | 0.76  | 1.59E-04 |
| I-E           | RS10840   | enterochelin esterase                            | siderophore dependant iron intake                                 | -3.81                 | 0.71  | 1.04E-03 |
| I-E           | RS10860   | ABC transporter permease                         | transport                                                         | -3.25                 | 0.59  | 1.19E-03 |
| I-E           | RS10870   | EntS, enterobactin transporter                   | cellular response to DNA damage stimulus / response to antibiotic | -3.21                 | 0.62  | 2.95E-03 |
| I-E           | RS10895   | 6-phospho-beta-glucosidase                       | carbohydrate metabolic process                                    | -1.63                 | 0.31  | 4.19E-02 |
| I-E           | RS11325   | cytochrome b562                                  | electron transfer activity                                        | 2.08                  | 0.43  | 3.29E-02 |
| I-E           | RS12165   | SbnA, 2,3-diaminopropionate biosynthesis protein | diaminopropionate biosynthesis                                    | -1.56                 | 0.28  | 3.29E-02 |
| I-E           | RS14775   | ferrous iron transport protein A                 | iron transport                                                    | -2.38                 | 0.46  | 8.88E-03 |
| I-E           | RS15245   | RuvA, Holliday junction branch migration protein | DNA repair/ SOS response                                          | 1.11                  | 0.14  | 1.59E-02 |
| I-E           | RS16715   | AAA ATPase                                       | unknown                                                           | -2.05                 | 0.38  | 1.05E-02 |
| I-E           | RS16720   | DUF4435 domain-containing protein                | unknown                                                           | -2.49                 | 0.43  | 1.40E-03 |
| I-E           | RS16840   | PTS lactose/cellobiose transporter subunit IIA   | carbohydrate transport                                            | -1.82                 | 0.32  | 9.63E-03 |
| I-E           | RS21500   | hypothetical protein                             | unknown                                                           | 2.73                  | 0.61  | 3.29E-02 |

**Table S9. Genes differentially expressed in *Serratia* I-F anti-JS26 strain**

| DE in strains          | locus_tag | product                                                        | GO molecular function      | log <sub>2</sub> (FC) | lfcSE | padj     |
|------------------------|-----------|----------------------------------------------------------------|----------------------------|-----------------------|-------|----------|
| <b>Early infection</b> |           |                                                                |                            |                       |       |          |
| wt, I-E, I-F           | RS02465   | ribose ABC transporter permease                                | sugar transport            | 1.65                  | 0.25  | 7.13E-03 |
| wt, I-E, I-F           | RS10625   | Ni/Fe-hydrogenase cytochrome b subunit                         | anaerobic respiration      | 3.53                  | 0.56  | 8.27E-05 |
| wt, I-E, I-F           | RS12610   | NarH, nitrate reductase subunit beta                           | nitrate reduction          | 3.28                  | 0.66  | 1.44E-02 |
| wt, I-F                | RS05850   | NhaA, Na <sup>+</sup> /H <sup>+</sup> antiporter               | sodium transport           | 1.46                  | 0.22  | 1.56E-02 |
| wt, I-F                | RS10630   | cytochrome-c3 hydrogenase                                      | redox process              | 3.25                  | 0.39  | 1.50E-08 |
| wt, I-F                | RS12615   | NarJ, nitrate reductase molybdenum cofactor assembly chaperone | anaerobic respiration      | 3.32                  | 0.67  | 1.56E-02 |
| I-E, I-F               | RS00965   | FadB, fatty acid oxidation complex subunit alpha               | fatty acid metabolism      | -1.77                 | 0.25  | 6.62E-04 |
| I-E, I-F               | RS02455   | ribokinase                                                     | D-ribose catabolism        | 1.93                  | 0.14  | 2.26E-17 |
| I-E, I-F               | RS02475   | D-ribose pyranase                                              | D-ribose catabolism        | 2.85                  | 0.56  | 1.62E-02 |
| I-E, I-F               | RS10190   | FadL, long-chain fatty acid transporter                        | fatty acid transport       | -2.78                 | 0.26  | 1.91E-14 |
| I-F                    | RS02450   | RbsR, transcriptional regulator                                | transcriptional regulation | 1.68                  | 0.16  | 5.22E-09 |
| I-F                    | RS03200   | hypothetical protein                                           | unknown                    | -2.60                 | 0.37  | 4.31E-05 |
| I-F                    | RS04170   | GlpC, anaerobic glycerol-3-phosphate dehydrogenase subunit C   | anaerobic respiration      | 2.37                  | 0.35  | 2.28E-04 |
| I-F                    | RS10635   | HyaD/HybD family hydrogenase maturation endopeptidase          | protein processing         | 2.60                  | 0.38  | 6.98E-05 |
| I-F                    | RS10885   | PRD domain-containing protein                                  | transcription regulation   | -2.63                 | 0.44  | 1.68E-03 |
| I-F                    | RS16980   | SpeF, ornithine decarboxylase                                  | spermidine biosynthesis    | 3.24                  | 0.61  | 5.32E-03 |
| <b>Mid-infection</b>   |           |                                                                |                            |                       |       |          |
| wt, I-E, I-F           | RS05850   | NhaA, Na <sup>+</sup> /H <sup>+</sup> antiporter               | sodium transport           | 2.14                  | 0.28  | 1.73E-05 |
| wt, I-E, I-F           | RS05855   | NhaR, transcriptional activator                                | sodium transport           | 1.46                  | 0.18  | 3.43E-04 |
| wt, I-E, I-F           | RS07090   | DUF2502 domain-containing protein                              | unknown                    | 2.24                  | 0.32  | 1.52E-04 |
| wt, I-E, I-F           | RS10685   | DUF2002 domain-containing protein                              | unknown                    | 3.29                  | 0.44  | 1.12E-06 |
| wt, I-E, I-F           | RS18615   | ABC transporter substrate-binding protein                      | transport                  | -4.24                 | 0.96  | 3.15E-02 |
| wt, I-E, I-F           | RS18685   | MenF, isochorismate synthase                                   | menaquinone biosynthesis   | 1.73                  | 0.16  | 8.27E-10 |
| wt, I-F                | RS11860   | glycine zipper 2TM domain-containing protein                   | unknown                    | 2.94                  | 0.56  | 8.06E-03 |
| I-E, I-F               | RS07645   | DNA polymerase IV                                              | DNA repair / SOS response  | 1.97                  | 0.26  | 3.34E-05 |

| DE in strains         | locus_tag | product                                                               | GO molecular function                                   | log <sub>2</sub> (FC) | lfcSE | padj     |
|-----------------------|-----------|-----------------------------------------------------------------------|---------------------------------------------------------|-----------------------|-------|----------|
| I-E, I-F              | RS08295   | RecA, recombinase                                                     | DNA repair / SOS response                               | 2.25                  | 0.38  | 3.11E-03 |
| I-E, I-F              | RS08300   | RecX, recombination regulator                                         | DNA repair / SOS response                               | 1.91                  | 0.30  | 2.68E-03 |
| I-E, I-F              | RS08850   | RseA, anti-sigma-E factor                                             | anti-sigma binding                                      | 1.31                  | 0.19  | 3.50E-02 |
| I-E, I-F              | RS09495   | SulA, cell division inhibitor                                         | cellular response to DNA damage stimulus / SOS response | 2.55                  | 0.28  | 1.81E-09 |
| I-E, I-F              | RS14825   | hypothetical protein                                                  | unknown                                                 | 2.56                  | 0.49  | 1.31E-02 |
| I-E, I-F              | RS21055   | RecN, DNA repair protein                                              | DNA repair/ SOS response                                | 3.06                  | 0.26  | 2.47E-18 |
| I-E, I-F              | RS21370   | DinI family protein                                                   | DNA repair/ SOS response                                | 1.78                  | 0.25  | 7.05E-04 |
| I-E, I-F              | RS22350   | LexA, repressor                                                       | DNA repair / SOS response                               | 1.70                  | 0.27  | 8.06E-03 |
| I-F                   | RS00630   | RNA-binding S4 domain protein                                         | response to heat                                        | 1.70                  | 0.28  | 1.31E-02 |
| I-F                   | RS03060   | lbpA, heat shock protein                                              | heat shock response                                     | 2.04                  | 0.29  | 2.23E-04 |
| I-F                   | RS03065   | lbpB, heat shock chaperone                                            | heat shock response                                     | 1.85                  | 0.29  | 3.31E-03 |
| I-F                   | RS09530   | HspQ, heat shock protein                                              | heat shock response                                     | 2.45                  | 0.37  | 1.93E-04 |
| I-F                   | RS22385   | FxsA, cytoplasmic membrane protein                                    | unknown                                                 | 1.81                  | 0.34  | 4.96E-02 |
| <b>Late infection</b> |           |                                                                       |                                                         |                       |       |          |
| wt, I-E, I-F          | RS05850   | NhaA, Na <sup>+</sup> /H <sup>+</sup> antiporter                      | sodium transport                                        | 1.74                  | 0.17  | 1.22E-09 |
| wt, I-E, I-F          | RS07090   | DUF2502 domain-containing protein                                     | unknown                                                 | 2.92                  | 0.38  | 3.19E-07 |
| wt, I-E, I-F          | RS07105   | DUF1107 domain-containing protein                                     | unknown                                                 | 2.60                  | 0.41  | 2.10E-04 |
| wt, I-E, I-F          | RS09545   | transmembrane protein                                                 | negative regulation of apoptotic process                | 1.71                  | 0.26  | 2.50E-03 |
| wt, I-E, I-F          | RS09860   | Mannose-1-phosphate guanylyltransferase/mannose-6-phosphate isomerase | polysaccharide biosynthetic process                     | 1.40                  | 0.21  | 1.03E-02 |
| wt, I-E, I-F          | RS10685   | DUF2002 domain-containing protein                                     | unknown                                                 | 4.80                  | 0.48  | 2.61E-15 |
| wt, I-E, I-F          | RS10690   | hypothetical protein                                                  | unknown                                                 | 4.49                  | 1.02  | 1.40E-02 |
| wt, I-E, I-F          | RS11860   | glycine zipper 2TM domain-containing protein                          | unknown                                                 | 3.92                  | 0.33  | 2.61E-21 |
| wt, I-E, I-F          | RS12140   | 6-phospho-beta-glucosidase                                            | carbohydrate metabolism                                 | -3.44                 | 0.79  | 2.50E-02 |
| wt, I-E, I-F          | RS12150   | esterase                                                              | carbohydrate metabolism                                 | -3.77                 | 0.85  | 1.78E-02 |
| wt, I-E, I-F          | RS12155   | hypothetical protein                                                  | unknown                                                 | -3.77                 | 0.87  | 2.25E-02 |
| wt, I-E, I-F          | RS12340   | OsmB, osmotically-inducible lipoprotein                               | osmotic stress                                          | 2.22                  | 0.47  | 4.18E-02 |
| wt, I-E, I-F          | RS15300   | CutC, copper homeostasis protein                                      | copper homeostasis                                      | 1.48                  | 0.23  | 1.34E-02 |

| DE in strains | locus_tag | product                                                                                                          | GO molecular function                                    | log <sub>2</sub> (FC) | lfcSE | padj     |
|---------------|-----------|------------------------------------------------------------------------------------------------------------------|----------------------------------------------------------|-----------------------|-------|----------|
| wt, I-E, I-F  | RS15785   | DmsD, Tat proofreading chaperone                                                                                 | protein folding                                          | 2.26                  | 0.35  | 3.10E-04 |
| wt, I-E, I-F  | RS16005   | serine hydrolase                                                                                                 | proteolysis                                              | 1.97                  | 0.37  | 1.82E-02 |
| wt, I-E, I-F  | RS16385   | hypothetical protein                                                                                             | unknown                                                  | -2.21                 | 0.42  | 1.24E-02 |
| wt, I-E, I-F  | RS18680   | MenD, 2-succinyl-5-enolpyruvyl-6-hydroxy-3-cyclohexene-1-carboxylic-acid synthase                                | menaquinone biosynthesis                                 | 1.61                  | 0.19  | 9.01E-06 |
| wt, I-E, I-F  | RS18685   | MenF, isochorismate synthase                                                                                     | menaquinone biosynthesis                                 | 1.96                  | 0.12  | 1.79E-25 |
| wt, I-E, I-F  | RS22235   | hypothetical protein                                                                                             | unknown                                                  | 2.03                  | 0.35  | 6.04E-03 |
| wt, I-E, I-F  | RS22565   | OsmY, molecular chaperone                                                                                        | protein folding / Response to osmotic stress             | 2.06                  | 0.38  | 1.29E-02 |
| wt, I-F       | RS03770   | PutA, trifunctional transcriptional regulator/proline dehydrogenase/L-glutamate gamma-semialdehyde dehydrogenase | proline biosynthetic process/ transcriptional regulation | 2.81                  | 0.62  | 2.56E-02 |
| wt, I-F       | RS05855   | NhaR, transcriptional activator                                                                                  | sodium transport                                         | 1.14                  | 0.16  | 3.05E-02 |
| wt, I-F       | RS10950   | hypothetical protein                                                                                             | unknown                                                  | 2.93                  | 0.53  | 1.58E-03 |
| wt, I-F       | RS10955   | sugar ABC transporter permease                                                                                   | sugar transport                                          | 2.71                  | 0.53  | 8.00E-03 |
| wt, I-F       | RS12185   | non-ribosomal peptide synthetase                                                                                 | catalytic activity                                       | -1.94                 | 0.31  | 2.27E-03 |
| wt, I-F       | RS18615   | ABC transporter substrate-binding protein                                                                        | transport                                                | -4.10                 | 0.94  | 1.82E-02 |
| wt, I-F       | RS18670   | MenB, 1,2C4-dihydroxy-2-naphthoyl-CoA synthase                                                                   | menaquinone biosynthesis                                 | 1.56                  | 0.26  | 1.40E-02 |
| wt, I-F       | RS18675   | MenH, 2-succinyl-6-hydroxy-2%2C4-cyclohexadiene-1-carboxylate synthase                                           | menaquinone biosynthesis                                 | 1.81                  | 0.28  | 2.73E-03 |
| I-E, I-F      | RS01685   | oligopeptidase A                                                                                                 | proteolysis                                              | 1.53                  | 0.25  | 1.45E-02 |
| I-E, I-F      | RS03060   | IbpA, heat shock protein                                                                                         | heat shock response                                      | 1.75                  | 0.23  | 9.21E-05 |
| I-E, I-F      | RS04105   | UvrD, DNA helicase II                                                                                            | DNA repair                                               | 1.20                  | 0.14  | 1.30E-03 |
| I-E, I-F      | RS07645   | DinB, DNA polymerase IV                                                                                          | DNA repair / SOS response                                | 1.91                  | 0.17  | 2.06E-12 |
| I-E, I-F      | RS08295   | RecA, recombinase                                                                                                | DNA repair / SOS response                                | 2.32                  | 0.23  | 6.28E-11 |
| I-E, I-F      | RS08300   | RecX, recombination regulator                                                                                    | DNA repair / SOS response                                | 2.03                  | 0.17  | 2.26E-14 |
| I-E, I-F      | RS09495   | SulA, cell division inhibitor                                                                                    | SOS response                                             | 2.36                  | 0.18  | 7.71E-19 |
| I-E, I-F      | RS09530   | HspQ, heat shock protein                                                                                         | Heat shock response                                      | 2.08                  | 0.24  | 7.63E-08 |
| I-E, I-F      | RS10830   | isochorismate synthase                                                                                           | siderophore biosynthesis                                 | -3.82                 | 0.83  | 1.24E-02 |
| I-E, I-F      | RS10845   | MbtH family protein                                                                                              | siderophore biosynthesis                                 | -3.75                 | 0.92  | 4.67E-02 |
| I-E, I-F      | RS10855   | ABC transporter ATP-binding protein                                                                              | transport                                                | -3.80                 | 0.92  | 3.88E-02 |
| I-E, I-F      | RS13235   | stress protein                                                                                                   | tellurium resistance / response to stress                | 1.87                  | 0.31  | 4.60E-03 |

| DE in strains | locus_tag | product                                               | GO molecular function                     | log <sub>2</sub> (FC) | lfcSE | padj     |
|---------------|-----------|-------------------------------------------------------|-------------------------------------------|-----------------------|-------|----------|
| I-E, I-F      | RS13240   | Tellurium resistance                                  | tellurium resistance / response to stress | 1.73                  | 0.30  | 1.54E-02 |
| I-E, I-F      | RS14825   | hypothetical protein                                  | unknown                                   | 2.56                  | 0.39  | 1.09E-04 |
| I-E, I-F      | RS15240   | RuvB, Holliday junction branch migration DNA helicase | DNA repair/ SOS response                  | 1.12                  | 0.14  | 1.34E-02 |
| I-E, I-F      | RS16835   | 6-phospho-beta-glucosidase                            | carbohydrate metabolic process            | -1.21                 | 0.15  | 3.21E-03 |
| I-E, I-F      | RS21055   | RecN, DNA repair protein                              | DNA repair/ SOS response                  | 2.95                  | 0.19  | 5.09E-34 |
| I-E, I-F      | RS21370   | DinI family protein                                   | DNA repair/ SOS response                  | 1.75                  | 0.17  | 4.05E-09 |
| I-E, I-F      | RS22350   | LexA, repressor                                       | SOS response                              | 1.63                  | 0.15  | 1.59E-09 |
| I-F           | RS00620   | IgaA, intracellular growth attenuator family protein  | signal transduction / stress response     | 1.25                  | 0.18  | 2.50E-02 |
| I-F           | RS00630   | RNA-binding S4 domain protein                         | cellular response to heat                 | 1.50                  | 0.24  | 1.40E-02 |
| I-F           | RS01030   | RmuC, DNA recombination protein                       | DNA recombination                         | 1.96                  | 0.29  | 3.22E-04 |
| I-F           | RS01690   | RsmJ, 16S rRNA (guanine(1516)-N(2))-methyltransferase | rRNA methylation                          | 1.36                  | 0.22  | 3.80E-02 |
| I-F           | RS03065   | IbpB, heat shock chaperone                            | heat shock response                       | 1.65                  | 0.24  | 1.34E-03 |
| I-F           | RS06570   | Cas5f, type I-F CRISPR-associated protein             | CRISPR type I-F immunity                  | 1.74                  | 0.34  | 4.88E-02 |
| I-F           | RS06575   | Cas8f, type I-F CRISPR-associated protein             | CRISPR type I-F immunity                  | 1.84                  | 0.31  | 7.98E-03 |
| I-F           | RS06580   | Cas3, type I-F CRISPR-associated helicase             | CRISPR type I-F immunity                  | 2.03                  | 0.26  | 6.03E-06 |
| I-F           | RS06585   | Cas1, type I-F CRISPR-associated endonuclease         | CRISPR type I-F immunity                  | 2.19                  | 0.29  | 1.20E-05 |
| I-F           | RS12180   | cyclic peptide export ABC transporter                 | transport                                 | -1.91                 | 0.33  | 9.01E-03 |
| I-F           | RS13245   | TerB, tellurite resistance                            | tellurium resistance                      | 1.72                  | 0.31  | 2.52E-02 |
| I-F           | RS22385   | FxsA cytoplasmic membrane protein                     | unknown                                   | 1.41                  | 0.21  | 9.86E-03 |

## References

1. Jackson SA, Birkholz N, Malone LM, Fineran PC. 2019. Imprecise Spacer Acquisition Generates CRISPR-Cas Immune Diversity through Primed Adaptation. *Cell Host Microbe* 25:250-260.
2. Patterson AG, Jackson SA, Taylor C, Evans GB, Salmond GPC, Przybilski R, Staals RHJ, Fineran PC. 2016. Quorum Sensing Controls Adaptive Immunity through the Regulation of Multiple CRISPR-Cas Systems. *Mol Cell* 64:1102-1108.
3. Smith LM, Jackson SA, Malone LM, Ussher JE, Gardner PP, Fineran PC. 2021. The Rcs stress response inversely controls surface and CRISPR-Cas adaptive immunity to discriminate plasmids and phages. *Nat Microbiol* doi:10.1038/s41564-020-00822-7.
4. Thoma S, Schobert M. 2009. An improved *Escherichia coli* donor strain for diparental mating. *FEMS Microbiol Lett* 294:127-32.
5. Thomson NR, Crow MA, McGowan SJ, Cox A, Salmond GPC. 2000. Biosynthesis of carbapenem antibiotic and prodigiosin pigment in *Serratia* is under quorum sensing control. *Molecular Microbiology* 36:539-556.
6. Hampton HG, McNeil MB, Paterson TJ, Ney B, Williamson NR, Easingwood RA, Bostina M, Salmond GP, Fineran PC. 2016. CRISPR-Cas gene-editing reveals RsmA and RsmC act through FlhDC to repress the SdhE flavinylation factor and control motility and prodigiosin production in *Serratia*. *Microbiology* 162:1047-58.
